# Supplementary material
Source: HighWire-hosted journal article supplement (doi:10.1101/rna.079549.122)
Supplement: Supplemental_Legends.docx [file Supplemental_Legends.docx]

**SUPPLEMENTAL FIGURE LEGENDS**

**Supplemental Figure S1.** (A) The quality of RNA isolated from SARS-CoV-2-infected Vero E6-TMPRSS2-ACE2 cells after three rounds of poly(A) enrichment was assessed by Agilent Bioanalyzer. Gel-like image (left) and electropherograms (right) of three biological replicates (R1, R2, R3) are shown. (B) Example IGV tracks of ERCC136 RNA show sufficient read coverage in all replicates. Red lines correspond to mismatches to the reference genome due to C-to-U conversion by bisulfite treatment.

**Supplemental Figure S2.** Sanger sequencing results of region 2056-2174 in HIV D117/II RNA. Multiple sequence alignment of individual clones after bisulfite treatment with the corresponding sequences in HIV NL4-3 and HIV D117/II. Cs identified as m5C by Cristinelli et al. (2021) are marked in red. All clones show complete C-to-U conversion.
