# Supplementary material
Source: HighWire-hosted journal article supplement (doi:10.1101/rna.079549.122)
Supplement: Supplemental_Table_S1.xlsx [file Supplemental_Table_S1.xlsx]

## Sheet: Title
Supplemental Table S1. MeRanTK results for HIV and MLV datasets GSE157193 and GSE139606

## Sheet: HIV_SRR12553405 R1
#SeqID	refPos	refStrand	refBase	cov	C_count	methRate	mut_count	mutRate	CR	SNR	CalledBase	CB_count	state	95_CI_lower	95_CI_upper	p-value_mState	p-value_mRate	p-value_mState_adj	score	seqContext
chrX	101395730	+	C	345	121	0.351	0	0	0.9959	0.9971	T	224	M	0.302	0.402	1.47677e-40	4.84051e-39	0	1456.77	tgttacagggCcaagtgatcc
chrX	154400858	+	C	47	25	0.532	0	0	0.9971	1	C	25	M	0.392	0.667	3.62103e-10	2.73898e-09	9.72515e-09	92.5993	ctcatgagggCttccaatgtg
chrX	65729572	+	C	65	18	0.277	0	0	0.9973	1	T	47	M	0.183	0.396	9.73707e-07	4.41913e-06	3.34177e-14	19.795	tgaaagagggCattctcaatg
chrX	129794236	+	C	22	14	0.636	0	0	0.9971	1	C	14	M	0.43	0.803	5.56336e-06	2.07745e-05	8.33323e-06	31.5973	gaaaagggggCcaagtcaatg
chrX	108668414	+	C	20	12	0.6	0	0	0.9973	1	C	12	M	0.387	0.781	4.50951e-05	0.000138574	4.22662e-06	20.1602	ccctggtgtgCagggtccccc
chrX	24717693	+	C	21	8	0.381	0	0	0.9971	1	T	13	M	0.208	0.591	0.0034481	0.00581251	1.29865e-06	4.08777	gtaaaaggggCagatgaggaa
chrM	1488	+	C	60	56	0.933	0	0	0.997	0.9677	C	56	M	0.841	0.974	1.31527e-29	2.58671e-28	4.75894e-10	1359.77	acacaccgccCgtcaccctcc
chrM	1486	+	C	66	34	0.515	0	0	0.997	0.9706	C	34	M	0.397	0.632	3.48789e-13	3.42976e-12	1.17015e-11	168.194	gtacacaccgCccgtcaccct
chrM	9549	+	C	94	29	0.309	0	0	0.998	0.9592	T	65	M	0.224	0.408	2.88229e-10	2.23757e-09	0	62.0288	attaggagggCactggccccc
chr9	93452014	+	C	64	27	0.422	0	0	0.9945	0.9275	T	37	M	0.309	0.544	4.50687e-10	3.32382e-09	1.27911e-10	77.898	gcctggtgggCggcgggcggc
chr9	93452021	+	C	65	26	0.413	2	0.031	0.9945	0.9286	T	37	M	0.3	0.536	1.13341e-09	7.599e-09	9.52094e-11	69.6787	gggcggcgggCggcagcggcc
chr9	93452024	+	C	65	24	0.369	0	0	0.9945	0.9286	T	41	M	0.262	0.491	8.74035e-09	5.48597e-08	5.05826e-11	50.7282	cggcgggcggCagcggccccc
chr9	20620810	-	C	41	15	0.366	0	0	0.9971	1	T	26	M	0.236	0.519	1.27281e-05	4.46997e-05	5.62952e-10	17.3215	gaagctggagCtggggcaccg
chr9	131580322	-	C	37	9	0.273	4	0.108	0.9971	1	T	24	M	0.151	0.442	0.00208391	0.00384221	8.35643e-09	3.63575	ggaaagtgaaCttctccaagc
chr9	136839272	+	C	46	9	0.205	2	0.043	0.9971	1	T	35	M	0.112	0.345	0.0024816	0.00430405	2.39611e-11	2.61512	cccacgaggaCcgcagcaccc
chr8	144789794	-	C	46	34	0.739	0	0	0.9978	0.9787	C	34	M	0.597	0.844	4.34179e-15	4.57439e-14	1.50688e-08	291.725	gtgctgagggCctcaataaag
chr8	124543249	+	C	62	19	0.306	0	0	1	1	T	43	M	0.206	0.43	7.47995e-07	3.44779e-06	0	23.9559	ctcctgggggCacctcctatg
chr8	22619012	+	C	96	18	0.22	14	0.146	0.9965	1	T	64	M	0.144	0.321	2.67823e-06	1.09733e-05	0	14.4036	ggagctgaagCtgggtgaggg
chr8	143562220	+	C	87	18	0.212	2	0.023	0.996	0.9667	T	67	M	0.138	0.31	2.79136e-06	1.12802e-05	0	13.8327	tggagcagggCcagagccttg
chr8	144467296	+	C	26	12	0.462	0	0	0.9969	1	T	14	M	0.288	0.645	9.35917e-05	0.000268054	6.71553e-06	13.9019	ggccctgctcCaggggactca
chr8	143694878	+	C	32	10	0.312	0	0	0.9971	1	T	22	M	0.18	0.486	0.000851797	0.00183416	1.38955e-08	5.51077	ccgtctggctCagggactcca
chr7	44801346	+	C	321	67	0.238	40	0.125	0.9972	1	T	214	M	0.192	0.292	7.71332e-23	1.13771e-21	0	284.976	attgtggaggCcatggagcgc
chr7	100881346	+	C	157	62	0.395	0	0	0.9962	1	T	95	M	0.322	0.473	2.24782e-22	3.15765e-21	0	431.952	tgaccggaatCggcgagagcg
chr7	24650533	+	C	82	31	0.378	0	0	0.9919	1	T	51	M	0.281	0.486	2.77315e-11	2.33737e-10	2.68519e-12	91.891	tgcccgaatcCtccatggggg
chr7	25123741	-	C	61	22	0.361	0	0	0.9952	1	T	39	M	0.252	0.486	4.70343e-08	2.77502e-07	9.91896e-12	40.5821	gaagaaagggCagacttaata
chr7	151064224	+	C	71	16	0.229	1	0.014	0.9971	0.9861	T	54	M	0.146	0.34	1.16111e-05	4.12683e-05	0	11.5189	agcttgggccCtgggacgcct
chr7	151064223	+	C	71	15	0.211	0	0	0.9971	0.9861	T	56	M	0.132	0.32	2.67398e-05	8.59123e-05	0	9.08334	gagcttgggcCctgggacgcc
chr7	151064222	+	C	70	14	0.2	0	0	0.9971	0.9859	T	56	M	0.123	0.308	5.93749e-05	0.000175156	0	7.28059	agagcttgggCcctgggacgc
chr7	74691060	+	C	37	11	0.297	0	0	0.9966	1	T	26	M	0.175	0.458	0.000409104	0.00100571	4.29238e-08	6.51823	tgaaagaggaCgtgcttttgt
chr7	101239791	-	C	56	11	0.224	7	0.125	0.9964	0.9655	T	38	M	0.13	0.359	0.000520076	0.00119195	2.60168e-10	4.705	gacgcgggagCccacggagaa
chr7	4791534	+	C	22	9	0.409	0	0	1	0.9565	T	13	M	0.233	0.613	0.0014033	0.00274154	0	5.97102	cacagacacgCggggctggcc
chr7	75416601	+	C	34	9	0.265	0	0	0.9975	1	T	25	M	0.146	0.431	0.0021287	0.00390041	5.17902e-09	3.5111	ttgcacatagCagaggctcca
chr7	72948484	-	C	27	8	0.296	0	0	0.997	1	T	19	M	0.159	0.485	0.00426746	0.00687924	1.46945e-06	3.00549	ttgcacatagCagaggctccg
chr7	142813431	+	C	34	8	0.258	3	0.088	0.9971	1	T	23	M	0.137	0.432	0.00466637	0.0074814	4.65311e-09	2.55509	ggaaatgaggCtagtcttctt
chr7	45102066	-	C	32	8	0.25	0	0	0.9971	1	T	24	M	0.133	0.421	0.00475278	0.00757876	4.65311e-09	2.46285	tcctagggggCaagtctcaga
chr7	44385570	-	C	47	8	0.222	11	0.234	0.9978	0.9792	T	28	M	0.117	0.381	0.00505645	0.00793432	1.56188e-09	2.15218	gtgtgtgaagCtctgtgcttg
chr7	149198400	+	C	38	8	0.211	0	0	0.9972	1	T	30	M	0.111	0.363	0.00518708	0.00801146	3.96987e-09	2.02452	ccagatagggCacctgtcttc
chr6	4428080	+	C	194	70	0.361	0	0	0.9969	1	T	124	M	0.297	0.431	8.11511e-25	1.32998e-23	0	500.092	gtgctgtaggCttactttgtg
chr6	34245747	+	C	72	44	0.611	0	0	0.9971	1	C	44	M	0.496	0.715	6.75418e-18	7.96993e-17	7.27751e-13	374.441	tcagatggggCaccaataaca
chr6	41789673	+	C	25	21	0.875	1	0.04	0.9983	1	C	21	M	0.69	0.957	9.07044e-11	7.43272e-10	6.2908e-06	145.505	ttcagatgggCacttttcttc
chr6	35470729	+	C	47	19	0.404	0	0	0.9971	1	T	28	M	0.276	0.547	3.87073e-07	1.90311e-06	2.15912e-09	33.6741	gcaccatgggCaagccccagc
chr6	27810480	+	C	21	13	0.619	0	0	0.9982	1	C	13	M	0.409	0.792	1.59483e-05	5.53499e-05	1.55018e-06	25.4936	ggcgagagggCttgagtctca
chr6	7339313	-	C	125	13	0.224	67	0.536	0.9852	1	A	58	M	0.136	0.347	0.000114698	0.000322246	1.67738e-08	6.9634	cagtgtagagCtttatgctga
chr6	79915936	-	C	58	12	0.226	5	0.086	0.9985	1	T	41	M	0.135	0.355	0.000242443	0.000638578	1.09912e-14	5.83719	tgacttgaggCacaaatcact
chr6	43505061	+	C	30	10	0.333	0	0	0.9982	1	T	20	M	0.192	0.512	0.000797013	0.00174162	2.0569e-09	5.95857	gtgccactctCtgggtactgc
chr6	24495100	+	C	31	9	0.29	0	0	0.9972	1	T	22	M	0.161	0.466	0.00198753	0.00375846	7.69471e-09	3.91368	gtccctgcctCcgggcctgcg
chr6	6003744	-	C	44	9	0.205	0	0	0.998	1	T	35	M	0.112	0.345	0.0024816	0.00430405	3.755e-12	2.61512	tcgtcggcctCagggcggaaa
chr6	32972352	+	C	27	8	0.296	0	0	0.9971	1	T	19	M	0.159	0.485	0.00426746	0.00687924	1.29865e-06	3.00549	tcccagcgggCagtacagacc
chr5	40832532	-	C	270	112	0.415	0	0	0.9928	0.9677	T	158	M	0.358	0.474	1.16888e-38	3.44821e-37	0	1519.41	cccaagagggCagctgttgca
chr5	140401988	+	C	79	21	0.292	7	0.089	0.9962	1	T	51	M	0.199	0.405	1.72786e-07	9.10213e-07	8.10463e-15	28.3143	atagcggaggCggcggcacct
chr5	73502603	+	C	50	11	0.22	0	0	0.998	1	T	39	M	0.128	0.352	0.000527484	0.00119698	2.90878e-14	4.59847	attgaagaggCaagtatcaaa
chr5	6599910	-	C	53	11	0.212	1	0.019	0.9965	1	T	41	M	0.122	0.34	0.000541629	0.00121046	7.94254e-13	4.39927	cccaaggcagCgggggcccac
chr5	151183143	-	C	43	8	0.205	4	0.093	0.991	1	T	31	M	0.108	0.355	0.00262396	0.00447439	4.53621e-07	2.22581	agttccgaggCtttcccaggg
chr5	178142713	+	C	38	8	0.211	0	0	0.9971	1	T	30	M	0.111	0.363	0.00518708	0.00801146	4.65311e-09	2.02452	cccgagtgggCaaagccattg
chr4	2938760	-	C	54	12	0.222	0	0	0.9967	0.9153	T	42	M	0.132	0.349	0.000246004	0.000642223	1.07936e-12	5.71471	tctgggaggcCaaggcaggaa
chr4	177362293	+	C	44	11	0.25	0	0	0.9982	1	T	33	M	0.146	0.394	0.000479244	0.00114941	9.68436e-12	5.32156	ctgcagtgggCagatttgtcc
chr4	177362431	+	C	22	9	0.409	0	0	0.9982	1	T	13	M	0.233	0.613	0.0014033	0.00274154	5.19921e-07	5.97102	ttccagtgggCagaaaatggg
chr3	39408706	+	C	759	385	0.507	0	0	0.9971	0.9948	C	385	M	0.472	0.543	1.09354e-140	1.07531e-138	0	25419.3	gtgttatatcCtccaggaata
chr3	49104400	-	C	157	92	0.586	0	0	0.9971	1	C	92	M	0.508	0.66	1.54271e-36	4.13727e-35	0	1672.99	cctcccgactCagggataccc
chr3	9818796	+	C	57	23	0.404	0	0	0.9959	1	T	34	M	0.286	0.533	1.4593e-08	8.96861e-08	4.41563e-10	51.5755	aggggctgagCagggtatccc
chr3	46999354	+	C	86	21	0.244	0	0	0.9971	1	T	65	M	0.166	0.345	2.37446e-07	1.2077e-06	0	23.0397	gctacctgagCggagccgcca
chr3	48651455	-	C	21	14	0.667	0	0	0.9971	1	C	14	M	0.454	0.828	4.39953e-06	1.68553e-05	8.33323e-06	34.0263	gcccacggggCtggtggggga
chr3	129268528	+	C	36	9	0.25	0	0	0.997	1	T	27	M	0.138	0.411	0.0011061	0.00225034	9.70393e-09	3.65839	ctggagagggCtctgcagcag
chr22	42565069	-	C	54	34	0.63	0	0	0.9894	1	C	34	M	0.496	0.746	4.73888e-14	4.82058e-13	1.45168e-06	224.825	gagaacgtagCgtagtcatcc
chr22	38485991	-	C	44	17	0.386	0	0	0.9971	1	T	27	M	0.257	0.534	2.23875e-06	9.43476e-06	1.17886e-09	24.705	ttacatggggCagactgccta
chr22	50197516	+	C	48	15	0.312	0	0	1	1	T	33	M	0.199	0.453	8.35728e-06	3.08175e-05	0	15.1923	ttcaagagggCcatcgcagcg
chr22	24164531	+	C	60	16	0.267	0	0	0.9971	1	T	44	M	0.171	0.39	9.63845e-06	3.5103e-05	1.75415e-14	13.7498	tgaaggtgtcCtccatgcttc
chr22	17109520	+	C	26	11	0.423	0	0	0.996	1	T	15	M	0.255	0.611	0.000255817	0.000661983	1.02802e-05	10.0932	cccaggggggCtgcagtagac
chr22	31613614	+	C	27	11	0.407	0	0	0.9971	1	T	16	M	0.245	0.593	0.000272409	0.000686844	3.80182e-06	9.61277	ggctcacagtCtccatcgtgc
chr22	50221361	-	C	35	11	0.314	0	0	0.998	1	T	24	M	0.186	0.48	0.000385634	0.000964086	5.36623e-09	6.96616	ctccgcctcgCgggagactct
chr22	29341541	-	C	48	11	0.239	2	0.042	0.9971	0.9796	T	35	M	0.139	0.379	0.000496381	0.00117146	8.74387e-11	5.05647	ggaggggggcCggggcgtcgt
chr22	29341542	-	C	46	10	0.222	1	0.022	0.9971	0.9787	T	35	M	0.125	0.363	0.00111532	0.00225357	4.78079e-11	3.7039	tggaggggggCcggggcgtcg
chr22	17109523	+	C	25	9	0.36	0	0	0.996	1	T	16	M	0.202	0.555	0.00163083	0.003124	5.265e-06	5.07979	aggggggctgCagtagacccg
chr21	8254318	+	C	133	47	0.353	0	0	0.9971	0.95	T	86	M	0.277	0.438	9.94296e-17	1.12814e-15	0	208.563	aaggcagcagCcgaaaagatt
chr21	43688047	+	C	60	12	0.2	0	0	0.997	1	T	48	M	0.118	0.318	0.000265461	0.000675095	1.77636e-15	5.0758	gcagagggggCgaacagccac
chr21	41380112	+	C	60	11	0.2	5	0.083	0.9967	0.9836	T	44	M	0.116	0.324	0.000561303	0.001245	6.30829e-13	4.13089	cgagctagagCttcaggaccc
chr21	46411387	+	C	47	10	0.213	0	0	0.9971	1	T	37	M	0.12	0.349	0.00114543	0.00228312	4.78079e-11	3.52617	tggcagtctgCagagcgagct
chr20	62813706	+	C	68	15	0.227	2	0.029	0.9963	0.9855	T	51	M	0.143	0.342	2.49175e-05	8.25917e-05	6.35048e-14	9.86421	ggggctggggCctccggagct
chr20	62813700	+	C	69	15	0.217	0	0	0.9963	0.9857	T	54	M	0.136	0.328	2.60313e-05	8.53248e-05	6.35048e-14	9.38034	gctgcaggggCtggggcctcc
chr20	41174172	+	C	34	12	0.353	0	0	0.9971	1	T	22	M	0.215	0.521	0.000150605	0.0004076	3.2604e-08	9.85554	cctgcgggagCggggctcaga
chr20	298231	+	C	40	10	0.263	2	0.05	0.9954	1	T	28	M	0.15	0.42	0.000495255	0.00117146	8.83007e-08	4.94833	tcgacgtgagCttccgctcag
chr2	43225480	-	C	62	20	0.323	0	0	0.9963	0.9118	T	42	M	0.22	0.446	3.06322e-07	1.53161e-06	6.55143e-13	28.6013	cggggggcggCggcacagccc
chr2	43225483	-	C	62	18	0.295	1	0.016	0.9963	0.9118	T	43	M	0.196	0.419	1.75245e-06	7.71599e-06	2.70672e-13	20.2617	cgtcggggggCggcggcacag
chr2	43225477	-	C	64	17	0.266	0	0	0.9963	0.9143	T	47	M	0.173	0.385	4.48601e-06	1.69663e-05	1.65978e-13	15.7255	ggggcggcggCacagccctgc
chr2	65021224	+	C	22	10	0.455	0	0	0.9971	1	T	12	M	0.269	0.653	0.000521225	0.00119195	2.7709e-06	8.83777	ggacacagggCactgcccttg
chr2	74533063	+	C	45	10	0.238	3	0.067	1	1	T	32	M	0.135	0.385	0.000532933	0.00120012	0	4.41271	ggcaccgagaCagagggttaa
chr2	231146301	+	C	32	10	0.312	0	0	0.9971	1	T	22	M	0.18	0.486	0.000851797	0.00183416	1.38955e-08	5.51077	aggcaaggggCactcatagct
chr2	38681295	+	C	36	9	0.25	0	0	1	1	T	27	M	0.138	0.411	0.0011061	0.00225034	0	3.65839	ctggacccctCgggtgctgtc
chr19	14566839	-	C	246	65	0.264	0	0	0.9942	0.996	T	181	M	0.213	0.323	1.57689e-20	2.02253e-19	0	274.237	tgctcaagtgCaagcgtgaca
chr19	58394793	+	C	53	24	0.453	0	0	0.9978	1	T	29	M	0.327	0.585	4.01006e-09	2.57167e-08	1.36874e-11	65.8126	ccctttggggCagtcccagcc
chr19	47750180	+	C	93	22	0.237	0	0	0.9971	1	T	71	M	0.162	0.332	1.16619e-07	6.49104e-07	0	24.6682	attcttagggCtgacaaagaa
chr19	8468784	+	C	79	19	0.244	1	0.013	0.9965	1	T	59	M	0.162	0.349	1.09578e-06	4.8978e-06	1.55431e-15	18.3289	gatgagagggCcttaccaaaa
chr19	16132383	+	C	24	11	0.458	0	0	0.9982	1	T	13	M	0.279	0.649	0.000110472	0.000313359	9.57721e-07	12.1394	tcagccggggCcctcccacct
chr19	10829172	+	C	64	13	0.203	0	0	0.9971	1	T	51	M	0.123	0.317	0.000124103	0.000342152	2.66453e-15	6.23249	ctcaaggaggCgctcaacatc
chr19	40705367	-	C	34	12	0.353	0	0	0.9975	1	T	22	M	0.215	0.521	0.000150605	0.0004076	1.99145e-08	9.85554	atgtacagttCgaggggccgc
chr19	811390	+	C	43	10	0.233	0	0	0.9971	1	T	33	M	0.132	0.377	0.00108297	0.00223409	4.78079e-11	3.90053	cccaggcgggCtccccgctgc
chr19	40367744	+	C	29	8	0.276	0	0	0.9971	1	T	21	M	0.147	0.457	0.00223923	0.00400055	1.29865e-06	3.11598	tccccaatgcCtccacgggga
chr19	49085628	+	C	20	8	0.4	0	0	0.9956	1	T	12	M	0.219	0.613	0.003276	0.00555414	0.000535444	4.34922	gcgaggagggCgctacgcggt
chr19	55262457	-	C	23	8	0.348	0	0	0.9979	0.9583	T	15	M	0.188	0.551	0.00375816	0.00619362	5.3726e-07	3.64938	ctggaaggggCgctgagaaag
chr18	59345934	-	C	45	12	0.267	0	0	0.9965	1	T	33	M	0.16	0.41	0.000210006	0.000558123	3.95998e-10	7.04576	ccaccccgacCtccaagggca
chr18	47156154	-	C	32	8	0.333	8	0.25	0.998	1	T	16	M	0.18	0.533	0.00389809	0.00638854	4.58373e-07	3.46377	aaaatggagaCtcagaagagg
chr17	66302749	+	C	88	29	0.33	0	0	0.9971	1	T	59	M	0.24	0.433	2.33459e-10	1.86137e-09	1.11022e-16	67.1146	cgccccgcgcCcggggtcgcc
chr17	47974726	+	C	32	20	0.625	0	0	0.9952	1	C	20	M	0.453	0.771	2.30169e-08	1.38571e-07	2.35242e-06	69.1297	tcttggttagCgggagtgtgc
chr17	38799390	-	C	37	13	0.351	0	0	0.9963	0.9737	T	24	M	0.218	0.512	6.80793e-05	0.000198846	1.30659e-07	11.823	acggcggtggCggtggcgccg
chr17	40123248	+	C	46	13	0.283	0	0	0.9946	0.9388	T	33	M	0.173	0.425	9.11563e-05	0.000263638	5.55026e-09	9.09907	gtggtggcggCtcgggagcct
chr17	40123245	+	C	43	11	0.256	0	0	0.9946	0.9348	T	32	M	0.149	0.402	0.000470235	0.00113704	2.01034e-09	5.46482	ggggtggtggCggctcgggag
chr17	40123250	+	C	47	11	0.234	0	0	0.9946	0.94	T	36	M	0.136	0.372	0.000504535	0.00118125	2.01034e-09	4.93361	ggtggcggctCgggagcctcc
chr17	12996607	-	C	49	11	0.224	0	0	1	1	T	38	M	0.13	0.359	0.000520076	0.00119195	0	4.705	accaggtggaCagggtcctgg
chr17	17813590	-	C	48	10	0.25	8	0.167	0.9971	1	T	30	M	0.142	0.402	0.00102966	0.00215425	4.78079e-11	4.23808	tggcacagagCttccggcccg
chr17	75777945	-	C	24	9	0.375	0	0	0.9971	1	T	15	M	0.212	0.573	0.00155924	0.00300637	1.9438e-06	5.3456	cacttgttctCatagtagtaa
chr17	7910885	+	C	25	8	0.32	0	0	0.9971	0.9259	T	17	M	0.172	0.516	0.00402912	0.0065668	1.29865e-06	3.29619	ctccggggtaCggggcggcct
chr16	68359322	-	C	182	82	0.451	0	0	1	1	T	100	M	0.38	0.523	2.74058e-30	5.7748e-29	0	921.227	cggcccacccCtccaaggggc
chr16	21972062	+	C	47	29	0.617	0	0	0.9959	1	C	29	M	0.474	0.742	6.12789e-12	5.31685e-11	1.22624e-07	154.215	tcaagaggggCagcaacacca
chr16	2175896	+	C	49	17	0.347	0	0	0.9972	1	T	32	M	0.229	0.487	2.8432e-06	1.13344e-05	9.88922e-10	21.6141	gcagcgtctaCtccattgctg
chr16	30925776	+	C	47	15	0.319	0	0	1	0.9792	T	32	M	0.204	0.462	1.61729e-05	5.54768e-05	0	14.6577	cagccgggggCcgggggccgg
chr16	67842755	+	C	72	15	0.208	0	0	0.9971	0.9351	T	57	M	0.131	0.316	2.70842e-05	8.59123e-05	0	8.94179	acttccagggCggccgcaaga
chr16	1975355	+	C	87	15	0.2	12	0.138	0.9971	1	T	60	M	0.125	0.304	2.80803e-05	8.81244e-05	0	8.54247	agcgtggaggCtgctgtgctg
chr16	30925777	+	C	47	14	0.298	0	0	1	0.9792	T	33	M	0.187	0.44	3.9207e-05	0.000121748	0	11.5064	agccgggggcCgggggccgga
chr16	67842758	+	C	62	14	0.23	1	0.016	0.9971	0.9254	T	47	M	0.142	0.349	5.26534e-05	0.000160131	5.32907e-15	8.50167	tccagggcggCcgcaagacct
chr16	1445764	-	C	33	10	0.303	0	0	0.998	1	T	23	M	0.174	0.473	0.000877437	0.00187568	3.63446e-09	5.31127	accccggcctCgagggtgacc
chr16	57751994	+	C	32	9	0.281	0	0	0.9973	1	T	23	M	0.156	0.454	0.00203691	0.00380308	6.4055e-09	3.76958	tcacacggggCctgtcaacgt
chr16	2090161	-	C	39	9	0.243	2	0.051	0.9968	1	T	28	M	0.134	0.401	0.00225116	0.00400055	1.28379e-08	3.18375	agggatggagCcgctgccctc
chr16	28954870	+	C	23	8	0.364	1	0.043	0.9959	1	T	14	M	0.197	0.57	0.00360848	0.00601413	3.68826e-06	3.8561	tgacagtgaaCccttcaggat
chr16	69463445	+	C	23	8	0.348	0	0	1	1	T	15	M	0.188	0.551	0.00375816	0.00619362	0	3.64938	ttagagaaggCaccaaagctt
chr15	69455489	+	C	122	68	0.557	0	0	0.9987	1	C	68	M	0.469	0.642	1.20367e-26	2.08872e-25	0	826.315	atgacatgggCtttggtcttt
chr15	24977876	+	C	140	29	0.207	0	0	0.9963	0.9929	T	111	M	0.148	0.282	7.38869e-10	5.18968e-09	0	39.265	caggacggggCactccgcccc
chr15	90882311	+	C	30	17	0.567	0	0	0.9965	1	C	17	M	0.392	0.726	6.1856e-07	2.94315e-06	3.26122e-07	41.3711	gaggccacctCtccaagggct
chr15	78105296	-	C	84	18	0.237	8	0.095	0.9966	0.9882	T	58	M	0.155	0.344	2.43817e-06	1.01304e-05	7.77156e-16	15.6997	actgccgaggCtgtaggggcc
chr15	74631046	-	C	34	16	0.471	0	0	0.9971	1	T	18	M	0.315	0.633	2.99947e-06	1.17979e-05	1.18784e-07	27.7926	tgtgtattctCtgagcctctg
chr15	79322627	+	C	20	9	0.45	0	0	0.9828	1	T	11	M	0.258	0.658	0.000614251	0.00135227	0.00987315	7.4631	aagaaaggggCtctaagttct
chr15	83164055	-	C	33	8	0.242	0	0	0.9971	0.9706	T	25	M	0.128	0.41	0.00241734	0.00425366	4.65311e-09	2.68607	tcccagagggCgctgtgaagc
chr14	20343234	-	C	2341	853	0.367	19	0.008	0.9894	0.9869	T	1469	M	0.348	0.387	1.32225e-257	3.90062e-255	0	76248.8	tcagactgggCaggagatgcc
chr14	49586019	-	C	1275	424	0.333	1	0.001	0.9971	0.9992	T	850	M	0.307	0.359	4.51803e-140	3.33205e-138	0	18166.1	acggtctgatCcggaaatatg
chr14	49853853	-	C	270	101	0.455	48	0.178	0.9789	0.9677	T	121	M	0.391	0.521	2.22227e-31	5.04284e-30	0	1209.81	ctggaggatcCcttgagttca
chr14	20343108	-	C	106	53	0.5	0	0	0.9894	1	CT	53	M	0.406	0.594	1.21293e-18	1.4909e-17	9.91651e-12	385.988	ccgcaggggaCctcataaccc
chr14	49583637	-	C	27	25	0.926	0	0	0.9971	1	C	25	M	0.766	0.979	4.17065e-13	3.96884e-12	5.14279e-05	237.166	ttatccggggCatctactcaa
chr14	22834290	+	C	43	24	0.558	0	0	0.9976	1	C	24	M	0.411	0.696	1.29026e-09	8.45837e-09	2.98514e-09	87.7	cccaaaggggCttcactgaag
chr14	64400839	+	C	56	15	0.268	0	0	0.9967	1	T	41	M	0.17	0.396	2.07087e-05	7.02193e-05	6.65201e-12	11.9137	gttgaaggagCaagtacctgg
chr14	102348513	-	C	35	9	0.257	0	0	0.9972	1	T	26	M	0.142	0.421	0.00217142	0.00392987	7.17718e-09	3.39474	cacgtctcacCaggcagacag
chr14	102507560	-	C	42	9	0.214	0	0	0.9972	1	T	33	M	0.117	0.359	0.00242243	0.00425366	2.06917e-11	2.75572	tccgctgctgCgcggctcccg
chr14	100292335	-	C	41	8	0.211	3	0.073	0.9971	1	T	30	M	0.111	0.363	0.00518708	0.00801146	4.65311e-09	2.02452	gagggcgaggCtgtgcccgcc
chr13	48253908	+	C	66	15	0.227	0	0	0.9962	1	T	51	M	0.143	0.342	2.49175e-05	8.25917e-05	6.92779e-14	9.86421	ctaggaggagCatacttgtac
chr13	45337237	-	C	40	10	0.256	1	0.025	0.9971	1	T	29	M	0.146	0.411	0.00101047	0.0021292	1.38955e-08	4.364	ggagtggaggCattgttttta
chr12	98503540	+	C	97	96	0.99	0	0	0.9971	0.9327	C	96	M	0.944	0.998	1.36445e-55	6.70854e-54	3.32401e-13	4971.53	ccgcctgtcaCgcgggagacc
chr12	98503550	+	C	97	93	0.959	0	0	0.9971	0.9327	C	93	M	0.899	0.984	5.68464e-51	2.09621e-49	2.4003e-13	4199.57	cgcgggagacCggggttcaat
chr12	98503549	+	C	97	77	0.802	1	0.01	0.9971	0.9327	C	77	M	0.711	0.869	1.34345e-35	3.30265e-34	3.39728e-14	1910.32	acgcgggagaCcggggttcaa
chr12	76559476	-	C	101	66	0.653	0	0	0.9936	1	C	66	M	0.557	0.739	1.04238e-27	1.92188e-26	5.32907e-13	991.16	tagacgcttaCggggcctcgg
chr12	113097146	+	C	55	20	0.364	0	0	0.9974	1	T	35	M	0.249	0.496	1.14939e-07	6.49104e-07	1.09045e-11	34.601	cctgagagggCcaagcagaga
chr12	122984707	-	C	37	15	0.405	0	0	0.9971	0.9737	T	22	M	0.263	0.565	1.02677e-05	3.69387e-05	8.92923e-08	19.7144	gctctgtcccCgagaagctac
chr12	121319809	-	C	72	15	0.208	0	0	0.9969	0.9114	T	57	M	0.131	0.316	2.70842e-05	8.59123e-05	0	8.94179	gttatggatgCtatgtgatca
chr12	106999704	-	C	59	13	0.22	0	0	0.9974	1	T	46	M	0.134	0.341	0.00011636	0.000323832	5.06262e-13	6.82988	aggctttagcCaaatgggcgg
chr12	68648763	+	C	49	10	0.204	0	0	0.9971	1	T	39	M	0.115	0.336	0.0011735	0.00232338	4.78079e-11	3.36474	gctcaggaggCgttggaaagt
chr12	6493715	-	C	30	9	0.3	0	0	0.9986	1	T	21	M	0.167	0.479	0.0019356	0.00368389	5.35288e-10	4.06926	ggaaaggaggCaagtccacgc
chr12	6967692	-	C	46	9	0.257	11	0.239	0.9971	1	T	26	M	0.142	0.421	0.00217142	0.00392987	8.35643e-09	3.39474	gagggtgaggCcgaggctgcc
chr12	55971677	+	C	29	8	0.276	0	0	0.9975	1	T	21	M	0.147	0.457	0.00223923	0.00400055	8.5054e-07	3.11598	ccagtgtgggCttgaccaggc
chr12	116237504	-	C	57	9	0.2	12	0.211	0.9971	1	T	36	M	0.109	0.338	0.00250948	0.00430405	2.39611e-11	2.55007	gggagatgaaCccaacctagt
chr12	53299446	+	C	22	8	0.364	0	0	0.997	1	T	14	M	0.197	0.57	0.00360848	0.00601413	1.45954e-06	3.8561	gccagctgggCagaatgttgg
chr11	75404677	+	C	1480	679	0.459	0	0	0.9971	0.998	T	801	M	0.434	0.484	4.15635e-240	6.13061e-238	0	70466.9	tctaggtgtgCtgggcatcaa
chr11	65120699	-	C	64	38	0.594	0	0	0.9971	1	C	38	M	0.471	0.705	2.4244e-15	2.64888e-14	1.83624e-11	261.836	agaagaagggCcccaatgcca
chr11	85484119	+	C	144	35	0.248	3	0.021	0.9971	0.9931	T	106	M	0.184	0.326	5.21814e-12	4.6647e-11	0	72.7525	tacaagagggCgtgaaaccgt
chr11	85484146	+	C	28	21	0.808	2	0.071	0.9971	1	C	21	M	0.621	0.915	6.85238e-10	4.93037e-09	2.99947e-05	119.555	gtaaatgggtCaggtccgcgc
chr11	67432774	+	C	74	27	0.365	0	0	0.9954	0.9867	T	47	M	0.264	0.479	8.09984e-10	5.55686e-09	3.92131e-13	64.8986	cctgggccatCtccactccca
chr11	64288441	+	C	20	16	0.8	0	0	0.9971	1	C	16	M	0.584	0.919	1.54171e-07	8.2692e-07	0.000956976	63.6489	tgggcttcttCcgggtgcacc
chr11	3827134	-	C	25	17	0.68	0	0	0.9983	1	C	17	M	0.484	0.828	2.19668e-07	1.13688e-06	3.32171e-06	54.7952	tctctcccttCtccaatgagg
chr11	65778162	-	C	31	17	0.548	0	0	0.9956	0.9118	C	17	M	0.378	0.708	7.17066e-07	3.35769e-06	8.18259e-07	39.4548	cagagggggcCgggctgggct
chr11	65778163	-	C	31	16	0.516	0	0	0.9956	0.9118	C	16	M	0.348	0.68	2.199e-06	9.40153e-06	6.27911e-07	31.5388	ccagagggggCcgggctgggc
chr11	66276687	+	C	62	14	0.226	0	0	0.9978	0.9538	T	48	M	0.14	0.344	5.3465e-05	0.00016094	8.88178e-16	8.34611	gccaggggatCcaggacctgg
chr11	65079503	-	C	73	14	0.203	4	0.055	0.9977	1	T	55	M	0.125	0.312	5.86888e-05	0.000174881	1.11022e-15	7.39864	gggcagaagaCttgtccggag
chr11	65863453	+	C	46	11	0.256	3	0.065	1	1	T	32	M	0.149	0.402	0.000470235	0.00113704	0	5.46482	ggagctgaggCctggagagta
chr11	9577222	+	C	32	9	0.281	0	0	0.9979	1	T	23	M	0.156	0.454	0.00203691	0.00380308	2.37548e-09	3.76958	tctgcgtgggCagaagatgat
chr11	204834	-	C	39	8	0.222	3	0.077	1	1	T	28	M	0.117	0.381	0.00505645	0.00793432	0	2.15218	gggctgtgaaCcctaagtggg
chr10	97498275	-	C	33	19	0.576	0	0	0.9977	1	C	19	M	0.408	0.728	9.46457e-08	5.4746e-07	1.1101e-07	54.4586	caggtggctgCaggtacggca
chr10	14520308	-	C	58	12	0.207	0	0	0.9967	1	T	46	M	0.123	0.328	0.000259316	0.000665203	1.25755e-12	5.27226	cttttcatttCtccaagagga
chr10	809755	-	C	36	10	0.278	0	0	0.997	1	T	26	M	0.158	0.44	0.000948084	0.00201212	1.69229e-08	4.79114	tgcagacaatCgaggcgaggg
chr10	73249031	-	C	38	8	0.235	4	0.105	0.9968	1	T	26	M	0.124	0.4	0.00491239	0.00779115	7.66231e-09	2.29704	gaagctgaggCagtaagatca
chr1	44778634	+	C	803	192	0.24	3	0.004	0.9971	1	T	608	M	0.212	0.271	4.13548e-60	2.43993e-58	0	2413.63	tgctagagggCaaagagttgg
chr1	109100508	+	C	340	153	0.45	0	0	0.9928	0.9855	T	187	M	0.398	0.503	8.56816e-53	3.61087e-51	0	3170.34	cccgaggtccCggagctggcc
chr1	158256896	+	C	231	71	0.307	0	0	0.994	0.9914	T	160	M	0.251	0.37	6.15323e-23	9.5537e-22	0	396.473	gatgtggatgCggggtgagca
chr1	158329538	-	C	314	67	0.213	0	0	0.9937	0.9968	T	247	M	0.172	0.262	1.00778e-20	1.35134e-19	0	229.994	gatgtggatgCggggtgagca
chr1	32334484	-	C	66	33	0.5	0	0	0.9964	1	CT	33	M	0.383	0.617	1.04637e-12	9.64619e-12	3.23583e-11	151.314	aaggaaggggCtattgcctcc
chr1	43360561	+	C	100	22	0.22	0	0	0.9975	0.9901	T	78	M	0.15	0.311	1.30311e-07	7.11883e-07	0	22.7223	cccgagtgggCtccctaagct
chr1	156743366	-	C	73	20	0.274	0	0	0.9949	0.9605	T	53	M	0.185	0.386	4.22215e-07	2.04186e-06	5.06262e-14	23.5744	ggcctgcaaaCtgggaacccc
chr1	16396655	+	C	27	15	0.556	0	0	0.9971	1	C	15	M	0.373	0.724	2.00869e-06	8.71417e-06	1.03088e-05	31.8861	agatacgtttCggagtggttg
chr1	158355937	+	C	62	17	0.274	0	0	0.9972	1	T	45	M	0.179	0.396	4.28473e-06	1.66315e-05	2.79776e-14	16.3176	gatgtggatgCggggtgagca
chr1	151242502	+	C	38	12	0.316	0	0	0.9963	1	T	26	M	0.191	0.475	0.000174551	0.000468115	9.15393e-08	8.60649	tcagtgagggCtcgcctattc
chr1	42766676	-	C	37	11	0.297	0	0	0.9968	1	T	26	M	0.175	0.458	0.000409104	0.00100571	3.27929e-08	6.51823	gcccaggcctCgggcgccgcc
chr1	156213124	+	C	53	10	0.217	7	0.132	0.9949	1	T	36	M	0.123	0.356	0.00113065	0.00226898	8.80364e-10	3.61285	gagggtgaagCtcctcgacac
chr1	35565373	+	C	24	9	0.375	0	0	0.9968	1	T	15	M	0.212	0.573	0.00155924	0.00300637	2.66785e-06	5.3456	ggccgacctgCaggagctctg
chr1	53275645	-	C	34	9	0.273	1	0.029	1	1	T	24	M	0.151	0.442	0.00208391	0.00384221	0	3.63575	agtgatgaagCtggctgccta
chr1	1014379	+	C	50	9	0.2	5	0.1	0.9942	0.9804	T	36	M	0.109	0.338	0.00250948	0.00430405	8.22393e-10	2.55007	ccctggaggaCcagctcccgc

## Sheet: HIV_SRR12553407_R2
#SeqID	refPos	refStrand	refBase	cov	C_count	methRate	mut_count	mutRate	CR	SNR	CalledBase	CB_count	state	95_CI_lower	95_CI_upper	p-value_mState	p-value_mRate	p-value_mState_adj	score	seqContext
chrX	101395730	+	C	170	73	0.429	0	0	0.9972	0.9551	T	97	M	0.357	0.505	1.01248e-26	3.11338e-25	0	678.152	tgttacagggCcaagtgatcc
chrX	108668414	+	C	27	21	0.778	0	0	1	1	C	21	M	0.592	0.894	1.13775e-09	9.32957e-09	0	111.271	ccctggtgtgCagggtccccc
chrX	65729572	+	C	62	21	0.339	0	0	0.9966	1	T	41	M	0.233	0.463	1.23707e-07	7.48325e-07	5.51115e-13	33.8592	tgaaagagggCattctcaatg
chrX	53548026	-	C	103	20	0.225	14	0.136	0.998	0.981	T	69	M	0.15	0.322	2.86734e-07	1.6532e-06	0	19.6856	agcctcgaggCctctccactg
chrX	101395731	+	C	80	19	0.241	1	0.013	0.9972	0.9412	T	60	M	0.16	0.345	1.11567e-06	5.96641e-06	2.22045e-16	18.0639	gttacagggcCaagtgatcca
chrX	40074182	-	C	49	11	0.224	0	0	0.9977	1	T	38	M	0.13	0.359	0.000520076	0.00128054	2.72485e-11	4.705	cggccaggctCtccaatggca
chrX	47180496	+	C	36	10	0.278	0	0	0.9947	1	T	26	M	0.158	0.44	0.000948084	0.00212026	1.58768e-07	4.79114	gcccagtgggCcatctcacag
chrX	13760633	+	C	31	9	0.31	2	0.065	1	0.9688	T	20	M	0.173	0.492	0.00188095	0.00387749	0	4.23777	agcctcgaggCtccgcggggg
chrM	2818	+	C	552	242	0.44	2	0.004	0.9975	0.9718	T	308	M	0.399	0.482	2.46824e-86	2.27695e-84	0	8267.61	tcggttggggCgacctcggag
chrM	9549	+	C	136	44	0.324	0	0	0.9982	0.9855	T	92	M	0.251	0.406	1.76483e-15	2.32579e-14	0	162.732	attaggagggCactggccccc
chrM	1488	+	C	28	27	0.964	0	0	0.9977	0.9032	C	27	M	0.823	0.994	7.583e-15	8.22978e-14	3.22633e-05	313.716	acacaccgccCgtcaccctcc
chrM	1486	+	C	35	18	0.514	0	0	0.9977	0.9211	C	18	M	0.356	0.67	3.91235e-07	2.22101e-06	7.73319e-08	41.0234	gtacacaccgCccgtcaccct
chrM	9738	-	C	88	17	0.224	12	0.136	0.9972	0.9263	T	59	M	0.145	0.329	5.57887e-06	2.21355e-05	1.11022e-16	12.915	tactctgaggCttgtaggagg
chrM	1678	+	C	23	11	0.478	0	0	0.9975	1	T	12	M	0.292	0.67	0.000202698	0.000588943	2.44897e-06	11.8774	tgagctaaacCtagccccaaa
chr9	20620810	-	C	56	26	0.464	0	0	0.9972	1	T	30	M	0.34	0.593	6.57781e-10	5.51639e-09	1.00726e-10	81.2151	gaagctggagCtggggcaccg
chr9	35657770	-	C	104	23	0.221	0	0	0.9983	1	T	81	M	0.152	0.31	6.07516e-08	4.0031e-07	0	25.25	ccacacggggCtcattctcag
chr9	136808026	+	C	30	16	0.533	0	0	0.994	0.9375	C	16	M	0.361	0.698	1.94405e-06	9.69395e-06	2.26832e-06	33.0268	ggctgaggttCccgagtcgcc
chr9	93452014	+	C	38	13	0.342	0	0	0.9959	0.9268	T	25	M	0.212	0.501	7.09115e-05	0.000229529	1.903e-07	11.442	gcctggtgggCggcgggcggc
chr9	133056040	+	C	57	12	0.211	0	0	0.9972	1	T	45	M	0.125	0.333	0.000256121	0.000730441	4.17888e-13	5.37631	cgggaaggggCcttgccaccc
chr9	93452021	+	C	41	11	0.268	0	0	0.9959	0.9318	T	30	M	0.157	0.419	0.000451269	0.00118098	5.04813e-10	5.77588	gggcggcgggCggcagcggcc
chr9	93452024	+	C	42	11	0.262	0	0	0.9959	0.9333	T	31	M	0.153	0.411	0.000460915	0.00118582	5.04813e-10	5.61604	cggcgggcggCagcggccccc
chr9	89377717	-	C	59	11	0.22	9	0.153	0.9976	1	T	39	M	0.128	0.352	0.000527484	0.00128054	8.21565e-14	4.59847	acagatggaaCcttcacaagg
chr9	137216787	+	C	23	9	0.45	3	0.13	0.9972	1	T	11	M	0.258	0.658	0.000614251	0.00142552	0.000274092	7.4631	acccatgaggCtgcgctgcac
chr8	144789794	-	C	42	34	0.829	1	0.024	0.9972	0.9767	C	34	M	0.687	0.915	3.46665e-16	5.56172e-15	4.29882e-08	361.312	gtgctgagggCctcaataaag
chr8	125947580	+	C	53	24	0.453	0	0	0.9972	0.9138	T	29	M	0.327	0.585	4.01006e-09	3.14832e-08	5.91671e-11	65.8126	atgggtgagtCagggaagaaa
chr8	143562221	+	C	110	23	0.209	0	0	0.9961	0.9565	T	87	M	0.144	0.294	6.60386e-08	4.27513e-07	0	23.7086	ggagcagggcCagagccttgg
chr8	144467296	+	C	32	16	0.5	0	0	0.9965	1	CT	16	M	0.336	0.664	2.46079e-06	1.14941e-05	2.74639e-07	30.1811	ggccctgctcCaggggactca
chr8	124543249	+	C	30	8	0.267	0	0	0.9988	1	T	22	M	0.142	0.444	0.00457506	0.00835742	1.37389e-10	2.65451	ctcctgggggCacctcctatg
chr8	41542877	+	C	38	8	0.211	0	0	0.9936	1	T	30	M	0.111	0.363	0.00518708	0.00907125	1.15234e-07	2.02452	gtagatggggCcattgtactg
chr7	44801346	+	C	192	44	0.259	22	0.115	0.9976	0.9948	T	126	M	0.199	0.329	4.62445e-15	5.17097e-14	0	125.407	attgtggaggCcatggagcgc
chr7	24650533	+	C	77	22	0.286	0	0	0.9962	1	T	55	M	0.197	0.395	8.27709e-08	5.26594e-07	1.46549e-14	30.6774	tgcccgaatcCtccatggggg
chr7	45102066	-	C	22	15	0.682	0	0	0.9972	1	C	15	M	0.473	0.836	1.48356e-06	7.4991e-06	9.5058e-06	41.3705	tcctagggggCaagtctcaga
chr7	10974236	+	C	20	14	0.7	0	0	1	0.9524	C	14	M	0.481	0.855	3.34038e-06	1.43326e-05	0	36.8785	gacttgtcttCgcggccccag
chr7	100881346	+	C	73	17	0.233	0	0	0.9965	1	T	56	M	0.151	0.342	5.32345e-06	2.13517e-05	5.55111e-16	13.5188	tgaccggaatCggcgagagcg
chr7	151064224	+	C	60	16	0.267	0	0	0.9972	0.9677	T	44	M	0.171	0.39	9.63845e-06	3.59252e-05	1.42109e-14	13.7498	agcttgggccCtgggacgcct
chr7	75416601	+	C	34	14	0.412	0	0	0.9966	0.9714	T	20	M	0.264	0.578	2.25907e-05	8.09318e-05	1.23853e-07	17.1496	ttgcacatagCagaggctcca
chr7	151064223	+	C	60	14	0.233	0	0	0.9972	0.9677	T	46	M	0.144	0.354	5.18242e-05	0.000173846	4.21885e-15	8.66316	gagcttgggcCctgggacgcc
chr7	151064222	+	C	60	13	0.217	0	0	0.9972	0.9677	T	47	M	0.131	0.336	0.000117983	0.000359798	2.22045e-15	6.7014	agagcttgggCcctgggacgc
chr7	25123741	-	C	32	10	0.312	0	0	0.9961	0.9697	T	22	M	0.18	0.486	0.000851797	0.00191654	4.58271e-08	5.51077	gaagaaagggCagacttaata
chr7	100038450	+	C	32	10	0.312	0	0	0.9958	1	T	22	M	0.18	0.486	0.000851797	0.00191654	6.70879e-08	5.51077	gctaatggggCactgaaatgg
chr7	141660328	-	C	42	9	0.231	3	0.071	0.9982	1	T	30	M	0.126	0.383	0.00116204	0.00249298	1.37467e-09	3.3401	gccagtgaggCagtgccatgt
chr7	155003665	+	C	32	9	0.281	0	0	0.9963	0.9697	T	23	M	0.156	0.454	0.00203691	0.00417566	2.36905e-08	3.76958	acggaattccCgaggccgtag
chr7	6652334	+	C	25	8	0.364	3	0.12	0.9972	1	T	14	M	0.197	0.57	0.00360848	0.00697135	1.24605e-06	3.8561	acatagaggaCcacgaggagg
chr7	72943431	+	C	23	8	0.348	0	0	1	1	T	15	M	0.188	0.551	0.00375816	0.0071116	0	3.64938	tcgcagggggCttaggtcaga
chr7	142864456	+	C	24	8	0.333	0	0	0.997	0.9231	T	16	M	0.18	0.533	0.00389809	0.00733876	1.44926e-06	3.46377	gacacgggggCctgcctggcc
chr6	34421781	-	C	1094	191	0.204	157	0.144	0.9954	0.9918	T	746	M	0.179	0.231	7.38754e-56	4.54334e-54	0	1887.85	acctgcgagaCtcacaagagg
chr6	34245747	+	C	34	26	0.765	0	0	0.9972	0.9714	C	26	M	0.6	0.876	8.29649e-12	7.65351e-11	8.4695e-07	172.875	tcagatggggCaccaataaca
chr6	31631444	+	C	100	22	0.25	12	0.12	0.9972	0.9901	T	66	M	0.171	0.35	1.06398e-07	6.65437e-07	0	26.2759	cgcacagagaCccgctggggc
chr6	30730546	-	C	100	20	0.227	12	0.12	0.9931	0.9804	T	68	M	0.152	0.325	5.64684e-07	3.10997e-06	5.32907e-15	19.0215	gaagctgaggCctttgccata
chr6	34280149	-	C	28	15	0.536	0	0	0.9972	1	C	15	M	0.358	0.705	4.60734e-06	1.91024e-05	9.5058e-06	28.6672	ttccttttctCgaggtggatg
chr6	4428080	+	C	42	16	0.381	0	0	0.998	1	T	26	M	0.25	0.532	5.2139e-06	2.11421e-05	1.34996e-10	21.1309	gtgctgtaggCttactttgtg
chr6	24495100	+	C	47	16	0.34	0	0	0.997	1	T	31	M	0.222	0.483	6.55105e-06	2.54456e-05	9.53245e-10	18.3853	gtccctgcctCcgggcctgcg
chr6	158625174	+	C	30	8	0.267	0	0	0.9972	1	T	22	M	0.142	0.444	0.00457506	0.00835742	4.12745e-09	2.65451	atagtgcgggCgtgttccgag
chr5	40832532	-	C	180	70	0.389	0	0	0.9956	0.9783	T	110	M	0.321	0.462	3.83079e-25	1.00969e-23	0	548.134	cccaagagggCagctgttgca
chr5	134114892	+	C	74	18	0.243	0	0	0.9966	0.9024	T	56	M	0.16	0.352	1.17695e-06	6.11684e-06	6.66134e-16	17.051	cgcgccccggCgggcggagcg
chr5	6599910	-	C	49	14	0.286	0	0	0.9961	1	T	35	M	0.178	0.424	4.13921e-05	0.000142745	1.72931e-09	10.953	cccaaggcagCgggggcccac
chr5	176345297	+	C	76	13	0.2	11	0.145	0.9972	1	T	52	M	0.121	0.313	0.000125546	0.000376637	2.22045e-15	6.12535	cagattgaggCcttccgcagc
chr5	178055902	+	C	61	11	0.367	31	0.508	0.9905	0.9531	G	31	M	0.219	0.545	0.000318805	0.00085868	2.51715e-06	8.41289	aggagaatgaCgattttgcgc
chr5	177295160	+	C	33	11	0.333	0	0	0.9972	1	T	22	M	0.198	0.504	0.000360376	0.000963614	1.93287e-08	7.48046	caagagtgggCaatcttttag
chr5	113513872	+	C	35	10	0.286	0	0	0.9979	1	T	25	M	0.163	0.451	0.000462761	0.00118582	4.24644e-09	5.44426	cgctcccgtgCggagagacca
chr5	135028338	-	C	24	9	0.375	0	0	0.9972	0.9231	T	15	M	0.212	0.573	0.00155924	0.00328776	1.77698e-06	5.3456	actgagtggcCgggcctgcgg
chr5	127554094	+	C	20	8	0.4	0	0	0.9981	1	T	12	M	0.219	0.613	0.003276	0.00643003	0.000101281	4.34922	gtaaaaggggCaagaaaagta
chr5	135028339	-	C	23	8	0.348	0	0	0.9972	0.92	T	15	M	0.188	0.551	0.00375816	0.0071116	1.18713e-06	3.64938	gactgagtggCcgggcctgcg
chr4	1245321	-	C	25	21	0.84	0	0	0.9977	1	C	21	M	0.653	0.936	3.75775e-10	3.30146e-09	1.65362e-05	129.337	gctgaacaaaCagggaaacgt
chr4	2043921	+	C	105	26	0.248	0	0	0.9984	1	T	79	M	0.175	0.338	5.09079e-09	3.83368e-08	0	37.7231	gccagcggggCactgaggacc
chr4	2938755	-	C	51	11	0.216	0	0	0.9967	0.9273	T	40	M	0.125	0.346	0.000534665	0.00128949	5.54889e-13	4.49666	gaggccaaggCaggaagattg
chr4	37902324	+	C	24	8	0.348	1	0.042	0.9941	1	T	15	M	0.188	0.551	0.00375816	0.0071116	1.15162e-05	3.64938	gagatgtgaaCctgagccagg
chr3	39408706	+	C	792	430	0.543	0	0	0.9972	0.9987	C	430	M	0.508	0.577	4.52868e-161	8.35542e-159	0	35033.2	gtgttatatcCtccaggaata
chr3	49104400	-	C	138	82	0.599	1	0.007	0.9972	0.9928	C	82	M	0.515	0.677	7.6313e-33	3.12883e-31	0	1355.92	cctcccgactCagggataccc
chr3	9818796	+	C	117	36	0.308	0	0	0.9971	1	T	81	M	0.231	0.396	5.9858e-13	6.13544e-12	0	101.772	aggggctgagCagggtatccc
chr3	48651455	-	C	28	15	0.536	0	0	0.9972	1	C	15	M	0.358	0.705	4.60734e-06	1.91024e-05	9.5058e-06	28.6672	gcccacggggCtggtggggga
chr3	15051825	-	C	29	15	0.517	0	0	0.9972	1	C	15	M	0.344	0.686	5.21357e-06	2.11421e-05	9.5058e-06	27.2839	cagcctcactCaggcacgtac
chr3	38165710	+	C	37	14	0.378	0	0	0.9971	1	T	23	M	0.241	0.539	2.67853e-05	9.41313e-05	6.86734e-08	15.4031	gctgctctgcCgcgcggtgac
chr3	129268528	+	C	22	12	0.545	0	0	0.9975	1	C	12	M	0.347	0.731	6.13205e-05	0.000202029	3.33212e-06	17.5199	ctggagagggCtctgcagcag
chr3	52122414	-	C	74	12	0.2	14	0.189	0.9977	1	T	48	M	0.118	0.318	0.000265461	0.000731008	2.22045e-16	5.0758	agtgccgaggCccccagccac
chr3	184317478	+	C	37	11	0.297	0	0	0.9976	1	T	26	M	0.175	0.458	0.000409104	0.00107828	1.01626e-08	6.51823	tcccagggggCctactacatc
chr3	33865334	+	C	21	10	0.476	0	0	0.9976	1	T	11	M	0.283	0.676	0.000479415	0.00122003	1.66874e-06	9.4081	ccagtgggggCtgggactgct
chr3	129606442	-	C	26	10	0.385	0	0	0.9971	1	T	16	M	0.224	0.575	0.00067152	0.00153907	2.76588e-06	7.11639	ccctggacggCgcggcgggga
chr3	50100033	+	C	50	10	0.222	5	0.1	0.9962	1	T	35	M	0.125	0.363	0.00111532	0.0024644	1.96363e-10	3.7039	ggatgtgaggCtgatgaagag
chr3	133589829	+	C	57	10	0.208	9	0.158	0.9961	1	T	38	M	0.117	0.343	0.00115971	0.00249298	2.21362e-10	3.44356	agtaactgagCcagccaaggg
chr3	52229182	-	C	49	10	0.204	0	0	0.9976	1	T	39	M	0.115	0.336	0.0011735	0.00250302	2.15877e-11	3.36474	ggcgatggggCagagctgacg
chr3	129606437	-	C	26	9	0.346	0	0	0.9971	1	T	17	M	0.194	0.538	0.00169855	0.00352116	1.94027e-06	4.83928	gacggcgcggCggggaccgtg
chr3	129606440	-	C	26	9	0.346	0	0	0.9971	1	T	17	M	0.194	0.538	0.00169855	0.00352116	1.94027e-06	4.83928	ctggacggcgCggcggggacc
chr3	47850139	+	C	21	8	0.381	0	0	0.9972	1	T	13	M	0.208	0.591	0.0034481	0.00669657	1.18713e-06	4.08777	tctgctggggCtgtgtacaga
chr22	38485991	-	C	66	32	0.485	0	0	0.9972	1	T	34	M	0.368	0.603	3.07755e-12	2.98846e-11	4.12359e-12	135.735	ttacatggggCagactgccta
chr22	50221361	-	C	78	20	0.256	0	0	0.9979	1	T	58	M	0.173	0.363	4.71905e-07	2.63837e-06	0	21.8319	ctccgcctcgCgggagactct
chr22	50447386	-	C	94	19	0.232	12	0.128	0.9977	1	T	63	M	0.154	0.334	1.17402e-06	6.11684e-06	0	17.3131	gaggtggaggCtgtggcacct
chr22	42565069	-	C	23	13	0.565	0	0	0.9932	1	C	13	M	0.368	0.744	2.24842e-05	8.09318e-05	8.59215e-05	22.2433	gagaacgtagCgtagtcatcc
chr22	50197516	+	C	41	13	0.317	0	0	0.997	1	T	28	M	0.196	0.47	7.89948e-05	0.000251285	3.2187e-10	10.4339	ttcaagagggCcatcgcagcg
chr22	41620865	-	C	58	12	0.207	0	0	0.9974	1	T	46	M	0.123	0.328	0.000259316	0.000730441	2.89546e-13	5.27226	cgagggccgtCgtggccgccg
chr22	37659020	+	C	50	11	0.22	0	0	0.9982	0.9804	T	39	M	0.128	0.352	0.000527484	0.00128054	1.66533e-14	4.59847	cttcggggggCtgcgcgccga
chr22	24096025	+	C	45	8	0.211	7	0.156	0.997	0.9783	T	30	M	0.111	0.363	0.00518708	0.00907125	5.49844e-09	2.02452	atgaaggaggCtgcagaagga
chr21	43688047	+	C	81	23	0.284	0	0	0.9965	0.9878	T	58	M	0.197	0.39	1.92853e-08	1.34269e-07	0	35.0064	gcagagggggCgaacagccac
chr21	8254318	+	C	43	17	0.395	0	0	0.9972	0.9556	T	26	M	0.264	0.544	2.11623e-06	1.04119e-05	9.94349e-10	25.4332	aaggcagcagCcgaaaagatt
chr20	41174172	+	C	84	28	0.333	0	0	0.9972	1	T	56	M	0.242	0.439	4.96831e-10	4.26351e-09	0	62.9827	cctgcgggagCggggctcaga
chr20	62813700	+	C	52	18	0.353	1	0.019	0.9959	0.9811	T	33	M	0.236	0.49	1.23154e-06	6.31164e-06	8.50232e-11	25.1403	gctgcaggggCtggggcctcc
chr20	63738822	+	C	44	17	0.386	0	0	0.9973	0.9778	T	27	M	0.257	0.534	2.23875e-06	1.0591e-05	8.95687e-10	24.705	gcagcacgtgCggggctggga
chr20	58909771	+	C	65	13	0.2	0	0	0.9972	0.9848	T	52	M	0.121	0.313	0.000125546	0.000376637	2.22045e-15	6.12535	ctgcaggaggCtctgaacctc
chr20	62813706	+	C	50	11	0.22	0	0	0.9959	0.9804	T	39	M	0.128	0.352	0.000527484	0.00128054	2.16871e-12	4.59847	ggggctggggCctccggagct
chr20	50191788	+	C	29	8	0.276	0	0	0.9959	0.9062	T	21	M	0.147	0.457	0.00223923	0.00451516	3.89914e-06	3.11598	tacgcgggggCcgcgccggcg
chr20	29299243	-	C	40	8	0.211	2	0.05	0.9972	1	T	30	M	0.111	0.363	0.00518708	0.00907125	4.12745e-09	2.02452	ttaagaaggaCggctgggggc
chr2	97739485	+	C	392	66	0.202	66	0.168	0.9967	0.9949	T	260	M	0.162	0.249	2.61774e-20	4.59975e-19	0	209.909	aaggctgaggCtgcctgtgcc
chr2	84906575	+	C	130	28	0.217	1	0.008	0.9986	1	T	101	M	0.155	0.296	1.43976e-09	1.15494e-08	0	38.2882	tctgaagggaCccccccccaa
chr2	43225480	-	C	55	24	0.436	0	0	0.9969	0.9649	T	31	M	0.314	0.567	4.71056e-09	3.62124e-08	1.0842e-10	62.6982	cggggggcggCggcacagccc
chr2	43225483	-	C	52	23	0.442	0	0	0.9969	0.963	T	29	M	0.316	0.577	1.02697e-08	7.43041e-08	8.15297e-11	58.0505	cgtcggggggCggcggcacag
chr2	43225477	-	C	63	19	0.302	0	0	0.9969	0.9692	T	44	M	0.202	0.424	7.71251e-07	4.18517e-06	1.26676e-13	23.5045	ggggcggcggCacagccctgc
chr2	197501160	+	C	43	15	0.349	0	0	0.9959	1	T	28	M	0.224	0.498	1.39123e-05	5.13363e-05	3.21893e-09	16.3316	ccaaaggaggCattatgcttc
chr2	95832414	-	C	29	12	0.414	0	0	0.9963	0.9062	T	17	M	0.255	0.593	0.000116385	0.000357885	1.08096e-05	12.0445	ctggggctgaCagagatgtga
chr19	10687671	+	C	34	30	0.909	1	0.029	0.9969	1	C	30	M	0.764	0.969	1.978e-15	2.51683e-14	2.5134e-06	337.13	ctcccgggggCgggggcggat
chr19	14566839	-	C	157	43	0.274	0	0	0.9946	0.9937	T	114	M	0.21	0.348	4.03004e-15	4.64714e-14	0	130.08	tgctcaagtgCaagcgtgaca
chr19	40705367	-	C	55	17	0.309	0	0	0.9972	1	T	38	M	0.203	0.44	3.53607e-06	1.49978e-05	5.5318e-12	18.7965	atgtacagttCgaggggccgc
chr19	10829172	+	C	41	13	0.317	0	0	0.9972	0.9762	T	28	M	0.196	0.47	7.89948e-05	0.000251285	2.08732e-10	10.4339	ctcaaggaggCgctcaacatc
chr19	1424951	+	C	63	13	0.22	4	0.063	0.9977	1	T	46	M	0.134	0.341	0.00011636	0.000357885	2.6823e-13	6.82988	gaggaggagaCccgccccgtt
chr19	44172201	+	C	50	11	0.239	4	0.08	0.9954	0.9615	T	35	M	0.139	0.379	0.000496381	0.00125455	8.81394e-10	5.05647	actttaggaaCctgctgtcag
chr19	16532655	-	C	33	9	0.273	0	0	0.9972	1	T	24	M	0.151	0.442	0.00208391	0.00424842	7.41292e-09	3.63575	gctgatggggCacacttcgag
chr19	41438309	-	C	27	8	0.296	0	0	0.9977	1	T	19	M	0.159	0.485	0.00426746	0.007953	6.97079e-07	3.00549	aaggacaataCtccagttcct
chr19	41419215	+	C	34	8	0.235	0	0	0.9972	1	T	26	M	0.124	0.4	0.00491239	0.0088423	4.12745e-09	2.29704	gggcaaggggCgccagatgcc
chr18	59345934	-	C	48	10	0.208	0	0	0.9974	1	T	38	M	0.117	0.343	0.00115971	0.00249298	2.86142e-11	3.44356	ccaccccgacCtccaagggca
chr17	47974726	+	C	59	38	0.644	0	0	0.9963	0.9833	C	38	M	0.517	0.754	8.29415e-16	1.22422e-14	6.76329e-09	296.029	tcttggttagCgggagtgtgc
chr17	66302749	+	C	202	45	0.223	0	0	0.9972	0.9806	T	157	M	0.171	0.285	3.5945e-15	4.27862e-14	0	111.062	cgccccgcgcCcggggtcgcc
chr17	81888530	-	C	171	39	0.26	21	0.123	0.9953	0.9884	T	111	M	0.196	0.336	2.1171e-13	2.23203e-12	0	97.0898	acagcggaggCctgcacagag
chr17	50551110	+	C	25	18	0.72	0	0	0.9966	1	C	18	M	0.524	0.857	5.32528e-08	3.57278e-07	3.17749e-05	68.6353	ttgctcaattCagggctggag
chr17	38799390	-	C	58	16	0.276	0	0	0.997	0.9831	T	42	M	0.178	0.402	9.203e-06	3.46521e-05	5.91172e-12	14.3042	acggcggtggCggtggcgccg
chr17	7229605	-	C	61	14	0.259	7	0.115	0.9962	1	T	40	M	0.161	0.389	4.64494e-05	0.000157246	8.26916e-12	9.77785	gaagcagaggCcaccccgcct
chr17	75318971	-	C	23	12	0.522	0	0	0.9961	1	C	12	M	0.33	0.708	6.94966e-05	0.00022694	1.25984e-05	16.4471	ctcaccgtctCgggggttgtg
chr17	16068037	-	C	42	11	0.262	0	0	1	1	T	31	M	0.153	0.411	0.000460915	0.00118582	0	5.61604	ccagcgaagtCtccagtgcct
chr17	7351403	+	C	55	11	0.224	6	0.109	0.996	1	T	38	M	0.13	0.359	0.000520076	0.00128054	4.63267e-10	4.705	tgacccgaggCccacggggcc
chr17	38799396	-	C	52	11	0.212	0	0	0.997	0.9811	T	41	M	0.122	0.34	0.000541629	0.0012978	3.45501e-13	4.39927	agcaccacggCggtggcggtg
chr17	43498915	+	C	27	9	0.346	1	0.037	0.9972	1	T	17	M	0.194	0.538	0.00169855	0.00352116	1.84839e-06	4.83928	cctgagagggCacactaagca
chr17	38728669	+	C	28	8	0.286	0	0	0.9972	1	T	20	M	0.153	0.471	0.00437609	0.00807389	1.18713e-06	2.87859	ctagaaggggCtcagtgacag
chr17	10697299	-	C	35	8	0.229	0	0	0.9984	1	T	27	M	0.121	0.39	0.00498622	0.00893162	4.44923e-10	2.22225	ctcagcactgCgaggccgcca
chr17	80965468	+	C	37	8	0.216	0	0	0.9976	1	T	29	M	0.114	0.372	0.00512332	0.00907125	2.13214e-09	2.08639	ccaggaggggCcgcagggcgt
chr16	68359322	-	C	168	72	0.429	0	0	0.998	1	T	96	M	0.356	0.504	1.19228e-26	3.38425e-25	0	664.771	cggcccacccCtccaaggggc
chr16	21972062	+	C	43	34	0.791	0	0	0.9972	1	C	34	M	0.648	0.886	1.10856e-15	1.57331e-14	4.57482e-08	329.464	tcaagaggggCagcaacacca
chr16	2175896	+	C	59	21	0.356	0	0	0.9976	1	T	38	M	0.246	0.483	1.08895e-07	6.69707e-07	9.80127e-12	35.9754	gcagcgtctaCtccattgctg
chr16	1445764	-	C	53	13	0.245	0	0	0.9979	1	T	40	M	0.149	0.376	0.000105747	0.000333508	1.57874e-13	7.71793	accccggcctCgagggtgacc
chr16	1975355	+	C	72	12	0.207	14	0.194	1	1	T	46	M	0.123	0.328	0.000259316	0.000730441	0	5.27226	agcgtggaggCtgctgtgctg
chr16	4804456	-	C	60	12	0.2	0	0	0.9973	1	T	48	M	0.118	0.318	0.000265461	0.000731008	8.88178e-16	5.0758	ccacagcgggCgctcgctcct
chr16	8855066	-	C	20	9	0.45	0	0	0.9972	0.9524	T	11	M	0.258	0.658	0.000614251	0.00142552	0.000274092	7.4631	cgagacggggCttcagccggg
chr16	15036205	+	C	47	10	0.25	7	0.149	1	1	T	30	M	0.142	0.402	0.00102966	0.00228881	0	4.23808	cagaccgaggCcttccagaaa
chr16	30365206	-	C	41	8	0.222	5	0.122	0.9972	0.9762	T	28	M	0.117	0.381	0.00505645	0.00901366	4.12745e-09	2.15218	ttaggtgaagCtgcgctgccg
chr15	69455489	+	C	54	37	0.685	0	0	0.9987	1	C	37	M	0.553	0.793	4.16691e-16	6.40663e-15	9.24838e-12	314.445	atgacatgggCtttggtcttt
chr15	90882311	+	C	37	25	0.676	0	0	0.9967	1	C	25	M	0.515	0.804	1.05678e-10	9.51101e-10	1.44248e-06	128.35	gaggccacctCtccaagggct
chr15	98648776	+	C	85	18	0.212	0	0	0.9972	1	T	67	M	0.138	0.31	2.79136e-06	1.24098e-05	0	13.8327	ccctcccgcgCgggggcagct
chr15	74619296	+	C	70	14	0.226	8	0.114	0.9899	1	T	48	M	0.14	0.344	5.3465e-05	0.000177735	3.38062e-11	8.34611	tgaagggagaCtgcgataccc
chr15	30941699	+	C	38	9	0.237	0	0	0.9972	0.9744	T	29	M	0.13	0.392	0.00228842	0.00456447	7.41292e-09	3.08781	ctccagggggCcactgcgctg
chr14	20343234	-	C	753	307	0.41	5	0.007	0.9888	0.9754	T	441	M	0.376	0.446	1.87454e-96	2.30568e-94	0	11041.7	tcagactgggCaggagatgcc
chr14	49586019	-	C	791	223	0.282	0	0	0.9972	0.9987	T	568	M	0.252	0.314	1.45259e-71	1.07202e-69	0	3975.72	acggtctgatCcggaaatatg
chr14	49853853	-	C	213	79	0.411	21	0.099	0.9807	0.9771	T	113	M	0.344	0.482	2.76489e-24	6.37653e-23	0	640.689	ctggaggatcCcttgagttca
chr14	106005057	-	C	88	21	0.266	9	0.102	0.9972	0.967	T	58	M	0.181	0.372	2.05895e-07	1.20595e-06	6.66134e-16	25.4053	gtgtcagaaaCcccagggggg
chr14	105447903	+	C	24	10	0.417	0	0	0.9975	0.96	T	14	M	0.245	0.612	0.000599707	0.0014095	1.9274e-06	7.88353	cagctgatccCagggacaggt
chr14	20343108	-	C	24	10	0.417	0	0	0.9888	0.96	T	14	M	0.245	0.612	0.000599707	0.0014095	0.000157003	7.88353	ccgcaggggaCctcataaccc
chr14	31207110	-	C	22	9	0.409	0	0	0.9972	1	T	13	M	0.233	0.613	0.0014033	0.00297596	1.77698e-06	5.97102	gcgcagctccCgggagagccg
chr14	89162446	-	C	21	8	0.381	0	0	1	0.9545	T	13	M	0.208	0.591	0.0034481	0.00669657	0	4.08777	ggcaaaggggCagaaagagca
chr14	51094719	-	C	36	8	0.25	4	0.111	0.9989	1	T	24	M	0.133	0.421	0.00475278	0.00859694	1.15252e-10	2.46285	tacagcgaggCggacagcggc
chr13	27256484	+	C	102	18	0.207	15	0.147	0.9972	1	T	69	M	0.135	0.304	2.86434e-06	1.25826e-05	0	13.4767	tgggaaggagCctgagctgct
chr13	110914890	-	C	50	10	0.2	0	0	0.9972	1	T	40	M	0.112	0.33	0.00059342	0.0014095	9.54792e-14	3.62791	cgggcttctcCagcgaggagc
chr13	45337237	-	C	28	8	0.296	1	0.036	0.9972	1	T	19	M	0.159	0.485	0.00426746	0.007953	1.18713e-06	3.00549	ggagtggaggCattgttttta
chr13	110893021	-	C	30	8	0.286	2	0.067	0.9979	1	T	20	M	0.153	0.471	0.00437609	0.00807389	5.31198e-07	2.87859	gaaggtgagaCcgctttgcgg
chr12	76559476	-	C	96	66	0.688	0	0	0.9933	1	C	66	M	0.589	0.771	2.49823e-28	8.38043e-27	2.61895e-11	1073.16	tagacgcttaCggggcctcgg
chr12	98503550	+	C	40	40	1	0	0	0.9972	0.9524	C	40	M	0.912	1	1.86034e-23	4.03803e-22	1.00256e-07	829.547	cgcgggagacCggggttcaat
chr12	98503540	+	C	39	39	1	0	0	0.9972	0.975	C	39	M	0.91	1	7.34834e-23	1.50641e-21	4.52723e-06	785.814	ccgcctgtcaCgcgggagacc
chr12	98503549	+	C	40	33	0.825	0	0	0.9972	0.9524	C	33	M	0.68	0.913	1.17e-15	1.59899e-14	3.67513e-08	335.315	acgcgggagaCcggggttcaa
chr12	57498491	+	C	63	12	0.231	11	0.175	0.9972	1	T	40	M	0.137	0.361	0.000238782	0.000688365	4.17888e-13	5.96505	gcaacagagaCcaaggctctg
chr12	92145610	-	C	59	12	0.203	0	0	1	0.9219	T	47	M	0.12	0.323	0.000262429	0.000731008	0	5.17216	tgaggaagccCggggtggctg
chr12	98601382	+	C	48	11	0.229	0	0	0.9972	1	T	37	M	0.133	0.365	0.000512429	0.00128054	7.52773e-11	4.81659	atggaagggaCtgtttgcccg
chr12	122984707	-	C	27	10	0.37	0	0	0.9972	0.9643	T	17	M	0.215	0.558	0.000705059	0.00160597	2.53327e-06	6.78649	gctctgtcccCgagaagctac
chr12	132045422	+	C	38	9	0.237	0	0	0.9972	1	T	29	M	0.13	0.392	0.00228842	0.00456447	7.41292e-09	3.08781	gcagagagggCaaggagcaga
chr12	132624449	-	C	35	8	0.242	2	0.057	0.9979	1	T	25	M	0.128	0.41	0.00241734	0.00479569	1.4182e-09	2.68607	gtgagcgaggCtgcgagtgcc
chr12	113165818	-	C	29	8	0.348	6	0.207	0.9972	1	T	15	M	0.188	0.551	0.00375816	0.0071116	1.18713e-06	3.64938	tggggctgggCctgcaccccc
chr12	113165817	-	C	31	8	0.258	0	0	0.9972	1	T	23	M	0.137	0.432	0.00466637	0.00848222	4.12745e-09	2.55509	ggggctgggcCtgcaccccct
chr11	75404677	+	C	1075	489	0.455	0	0	0.9972	0.9954	T	586	M	0.425	0.485	1.4036e-174	5.1793e-172	0	36158.9	tctaggtgtgCtgggcatcaa
chr11	117822471	-	C	978	173	0.208	145	0.148	0.9957	0.999	T	660	M	0.182	0.237	1.20996e-51	6.37824e-50	0	1598.85	gactatgagaCcgttcgcaat
chr11	67432774	+	C	89	52	0.584	0	0	0.9972	0.9889	C	52	M	0.48	0.681	9.12614e-21	1.68377e-19	3.24185e-14	500.68	cctgggccatCtccactccca
chr11	118409077	+	C	102	42	0.412	0	0	0.9972	1	T	60	M	0.321	0.509	2.14297e-15	2.63585e-14	0	197.86	gcaagcggggCatcattggct
chr11	134224897	+	C	162	37	0.228	0	0	0.9971	1	T	125	M	0.17	0.299	7.13052e-13	7.11124e-12	0	76.6219	cattgctgctCgggcgccgca
chr11	85484119	+	C	122	34	0.281	1	0.008	0.9972	0.9385	T	87	M	0.209	0.367	3.90278e-12	3.69263e-11	0	80.9128	tacaagagggCgtgaaaccgt
chr11	65778163	-	C	29	19	0.655	0	0	0.9962	0.9355	C	19	M	0.473	0.801	4.22882e-08	2.88969e-07	5.24242e-05	66.3309	ccagagggggCcgggctgggc
chr11	65778162	-	C	27	17	0.63	0	0	0.9962	0.931	C	17	M	0.442	0.785	1.78912e-07	1.06481e-06	3.70012e-05	50.7328	cagagggggcCgggctgggct
chr11	66068715	+	C	44	17	0.386	0	0	0.9966	0.9778	T	27	M	0.257	0.534	2.23875e-06	1.0591e-05	2.68936e-09	24.705	gccgtgggggCagcaagaaat
chr11	90202479	-	C	62	16	0.281	5	0.081	0.995	1	T	41	M	0.181	0.408	8.97989e-06	3.41606e-05	1.19141e-10	14.5986	aaaagctgaaCcgatgcagtg
chr11	61866327	+	C	70	15	0.214	0	0	0.998	0.9859	T	55	M	0.134	0.324	2.63888e-05	9.36296e-05	0	9.22945	aaccttgggcCctggaagagt
chr11	34139252	+	C	46	12	0.353	12	0.261	0.9973	1	T	22	M	0.215	0.521	0.000150605	0.000448171	2.52193e-08	9.85554	gaggatgaggCtgaccaggga
chr11	65120699	-	C	23	11	0.478	0	0	0.9972	1	T	12	M	0.292	0.67	0.000202698	0.000588943	3.47599e-06	11.8774	agaagaagggCcccaatgcca
chr11	65778158	-	C	29	11	0.393	1	0.034	0.9962	0.9355	T	17	M	0.236	0.576	0.000288433	0.000788384	9.13465e-06	9.17627	gggggccgggCtgggcttctt
chr11	3827134	-	C	29	11	0.379	0	0	0.9983	1	T	18	M	0.227	0.56	0.000303895	0.000824539	7.49728e-07	8.77792	tctctcccttCtccaatgagg
chr11	65079503	-	C	54	10	0.208	6	0.111	0.9978	1	T	38	M	0.117	0.343	0.00115971	0.00249298	1.43063e-11	3.44356	gggcagaagaCttgtccggag
chr11	119047813	-	C	39	9	0.231	0	0	0.9966	1	T	30	M	0.126	0.383	0.00116204	0.00249298	1.65301e-08	3.3401	tccaggggggCccggctcatc
chr11	9585491	+	C	30	8	0.276	1	0.033	0.9972	1	T	21	M	0.147	0.457	0.00223923	0.00451516	1.18713e-06	3.11598	ttgaagagggCgatagtcgtt
chr10	72275190	+	C	136	26	0.22	18	0.132	0.997	0.9784	T	92	M	0.155	0.303	6.33985e-09	4.67881e-08	0	33.0448	gagtgttgaaCttcaacctga
chr10	78035642	+	C	35	11	0.314	0	0	0.9981	0.9722	T	24	M	0.186	0.48	0.000385634	0.00102373	4.08927e-09	6.96616	ttggtggtggCaagacaactg
chr10	97498275	-	C	26	10	0.385	0	0	0.9983	0.963	T	16	M	0.224	0.575	0.00067152	0.00153907	5.49937e-07	7.11639	caggtggctgCaggtacggca
chr1	44778634	+	C	555	134	0.243	3	0.005	0.9972	0.9964	T	418	M	0.209	0.28	7.08985e-43	3.27019e-41	0	1179.55	tgctagagggCaaagagttgg
chr1	158256896	+	C	254	87	0.343	0	0	0.9931	0.9922	T	167	M	0.287	0.403	9.07016e-29	3.34689e-27	0	699.931	gatgtggatgCggggtgagca
chr1	109100508	+	C	150	70	0.467	0	0	0.9923	0.9934	T	80	M	0.389	0.546	1.8882e-24	4.64496e-23	0	645.437	cccgaggtccCggagctggcc
chr1	158329538	-	C	304	67	0.22	0	0	0.9945	0.9967	T	237	M	0.177	0.27	4.41845e-21	8.58109e-20	0	241.997	gatgtggatgCggggtgagca
chr1	111238865	+	C	179	56	0.313	0	0	0.998	1	T	123	M	0.249	0.384	1.65894e-19	2.78249e-18	0	262.354	accgtgggggCccctgcctct
chr1	158355937	+	C	80	24	0.3	0	0	0.9968	1	T	56	M	0.211	0.408	1.56243e-08	1.10872e-07	0	39.4639	gatgtggatgCggggtgagca
chr1	10417495	+	C	31	16	0.516	0	0	0.9971	1	C	16	M	0.348	0.68	2.199e-06	1.0591e-05	1.22521e-07	31.5388	ggagagggggCtgcatcatta
chr1	24902330	-	C	47	17	0.362	0	0	0.9972	0.9792	T	30	M	0.24	0.505	2.60362e-06	1.20092e-05	9.94349e-10	22.7522	tccatggtggCcggcagcagc
chr1	24902326	-	C	48	17	0.354	0	0	0.9972	0.9796	T	31	M	0.234	0.496	2.72386e-06	1.22574e-05	9.94349e-10	22.1685	tggtggccggCagcagcagtg
chr1	24902329	-	C	48	17	0.354	0	0	0.9972	0.9796	T	31	M	0.234	0.496	2.72386e-06	1.22574e-05	9.94349e-10	22.1685	ccatggtggcCggcagcagca
chr1	16396655	+	C	34	16	0.471	0	0	0.998	1	T	18	M	0.315	0.633	2.99947e-06	1.30212e-05	3.00389e-08	27.7926	agatacgtttCggagtggttg
chr1	58783234	-	C	30	15	0.5	0	0	0.9973	0.9375	CT	15	M	0.332	0.668	5.83213e-06	2.28942e-05	6.8606e-08	26.0299	gtgaggagggCgcagcgggga
chr1	32334484	-	C	34	15	0.441	0	0	0.9965	0.9444	T	19	M	0.289	0.605	8.36693e-06	3.21604e-05	2.07633e-07	21.9979	aaggaaggggCtattgcctcc
chr1	58783229	-	C	31	14	0.483	2	0.065	0.9973	0.9394	T	15	M	0.314	0.656	1.52932e-05	5.5873e-05	6.84078e-06	21.1594	gagggcgcagCggggacgaca
chr1	42766676	-	C	49	14	0.286	0	0	0.9968	1	T	35	M	0.178	0.424	4.13921e-05	0.000142745	6.42955e-10	10.953	gcccaggcctCgggcgccgcc
chr1	58783232	-	C	29	13	0.448	0	0	0.9973	0.9355	T	16	M	0.284	0.625	4.3012e-05	0.000146958	5.38571e-06	16.1281	gaggagggcgCagcggggacg
chr1	39485692	+	C	55	13	0.236	0	0	0.995	1	T	42	M	0.144	0.363	0.00010946	0.000342296	2.66753e-11	7.39727	ctgcagggggCcaaggcaact
chr1	248850173	-	C	35	12	0.343	0	0	0.9974	1	T	23	M	0.208	0.508	0.000156868	0.000463075	2.09811e-08	9.51032	agccagactcCagggactgaa
chr1	156312060	-	C	39	8	0.205	0	0	0.9979	1	T	31	M	0.108	0.355	0.00262396	0.00517777	1.23736e-09	2.22581	ctccggggggCtagcaaagag

## Sheet: HIV_SRR12553409_R3
#SeqID	refPos	refStrand	refBase	cov	C_count	methRate	mut_count	mutRate	CR	SNR	CalledBase	CB_count	state	95_CI_lower	95_CI_upper	p-value_mState	p-value_mRate	p-value_mState_adj	score	seqContext
chrX	101395730	+	C	218	107	0.493	1	0.005	0.9958	0.9864	T	110	M	0.427	0.559	2.70456e-40	1.11563e-38	0	1808.95	tgttacagggCcaagtgatcc
chrX	108668414	+	C	60	44	0.733	0	0	0.9969	1	C	44	M	0.61	0.829	2.2419e-19	4.82496e-18	8.78737e-11	500.476	ccctggtgtgCagggtccccc
chrX	101395731	+	C	89	24	0.27	0	0	0.9958	0.9674	T	65	M	0.188	0.37	1.98369e-08	1.36378e-07	5.55111e-16	34.8313	gttacagggcCaagtgatcca
chrX	65729572	+	C	70	15	0.214	0	0	0.9972	0.9859	T	55	M	0.134	0.324	2.63888e-05	9.19892e-05	0	9.22945	tgaaagagggCattctcaatg
chrX	153798440	+	C	27	11	0.407	0	0	1	0.9643	T	16	M	0.245	0.593	0.000272409	0.000702305	0	9.61277	ctgagggcggCaccccagccc
chrX	24717693	+	C	20	10	0.5	0	0	0.9972	1	CT	10	M	0.299	0.701	0.00043592	0.00105775	2.73452e-06	10.0581	gtaaaaggggCagatgaggaa
chrX	54811042	+	C	30	9	0.3	0	0	0.9972	1	T	21	M	0.167	0.479	0.0019356	0.00362926	8.21014e-09	4.06926	cccgtaggggCaaggctcgcc
chrM	1465	+	C	2098	466	0.222	0	0	0.9975	0.9785	T	1632	M	0.205	0.24	2.53964e-143	4.1904e-141	0	13611.9	ttgaacagggCcctgaagcgc
chrM	2818	+	C	766	253	0.331	2	0.003	0.9975	0.9708	T	511	M	0.299	0.365	1.25301e-85	1.03373e-83	0	6416.08	tcggttggggCgacctcggag
chr9	35657770	-	C	159	62	0.39	0	0	0.9979	1	T	97	M	0.318	0.467	2.53526e-22	6.27477e-21	0	425.218	ccacacggggCtcattctcag
chr9	20620810	-	C	66	28	0.424	0	0	0.9972	0.9851	T	38	M	0.312	0.544	1.91708e-10	1.69456e-09	1.71296e-12	85.006	gaagctggagCtggggcaccg
chr9	136808026	+	C	49	20	0.408	0	0	1	0.9245	T	29	M	0.282	0.548	1.65287e-07	8.61231e-07	0	38.2695	ggctgaggttCccgagtcgcc
chr9	133362562	-	C	23	12	0.522	0	0	0.9978	0.9583	C	12	M	0.33	0.708	6.94966e-05	0.000209761	2.40749e-06	16.4471	tcacatggggCcttttctgag
chr9	131477824	+	C	61	13	0.213	0	0	0.9972	1	T	48	M	0.129	0.331	0.000119567	0.000340148	2.55351e-15	6.57767	ctggagcgggCagcccatgcc
chr9	93452014	+	C	36	12	0.333	0	0	0.9972	0.9474	T	24	M	0.202	0.497	0.000162944	0.000450599	3.20342e-08	9.18858	gcctggtgggCggcgggcggc
chr9	73165150	+	C	35	11	0.314	0	0	0.997	0.9459	T	24	M	0.186	0.48	0.000385634	0.000964086	2.7861e-08	6.96616	agaaaggggaCagacgtaaac
chr9	93452021	+	C	36	11	0.306	0	0	0.9972	0.9474	T	25	M	0.18	0.469	0.000397583	0.000984019	2.14049e-08	6.73473	gggcggcgggCggcagcggcc
chr9	93452024	+	C	37	10	0.27	0	0	0.9972	0.9487	T	27	M	0.154	0.43	0.000969729	0.00199177	1.36524e-08	4.63974	cggcgggcggCagcggccccc
chr8	144789794	-	C	58	48	0.828	0	0	0.9972	0.9831	C	48	M	0.711	0.904	9.46888e-23	2.46689e-21	5.92577e-09	751.535	gtgctgagggCctcaataaag
chr8	125947580	+	C	93	47	0.511	1	0.011	0.9972	0.9208	C	47	M	0.41	0.611	4.67822e-18	8.57674e-17	2.22045e-16	334.235	atgggtgagtCagggaagaaa
chr8	144467296	+	C	49	21	0.429	0	0	0.9972	1	T	28	M	0.3	0.567	6.14528e-08	3.59012e-07	3.67876e-09	45.4672	ggccctgctcCaggggactca
chr8	11831596	+	C	94	20	0.213	0	0	0.998	1	T	74	M	0.142	0.306	6.16066e-07	2.87691e-06	0	17.6583	tcggaaagggCaagcagtgac
chr8	144356996	-	C	42	14	0.333	0	0	0.996	0.9767	T	28	M	0.21	0.484	3.33111e-05	0.000113717	2.08116e-09	13.1713	acctacagcaCtccatggtga
chr8	125949875	+	C	25	10	0.4	0	0	0.9972	1	T	15	M	0.234	0.593	0.000636424	0.00140013	2.73452e-06	7.48021	gtagatggggCaagttgaagt
chr8	26656843	+	C	24	9	0.429	3	0.125	0.9972	1	T	12	M	0.245	0.635	0.000659196	0.00143115	1.91826e-06	7.0054	aggtatgaggCtgcagaaccg
chr8	144396602	-	C	36	8	0.222	0	0	0.9972	1	T	28	M	0.117	0.381	0.00505645	0.00799877	4.57161e-09	2.15218	tatggctactCaggggtaggc
chr8	143795324	-	C	39	8	0.211	1	0.026	0.9972	0.9512	T	30	M	0.111	0.363	0.00518708	0.00799877	4.57161e-09	2.02452	ggagaaggagCtgcctggaca
chr7	44801346	+	C	223	41	0.214	31	0.139	0.9976	1	T	151	M	0.161	0.277	8.31081e-14	1.08259e-12	0	86.6063	attgtggaggCcatggagcgc
chr7	75416601	+	C	56	27	0.482	0	0	0.9952	1	T	29	M	0.357	0.61	1.14729e-10	1.09213e-09	3.16971e-09	95.7289	ttgcacatagCagaggctcca
chr7	100881346	+	C	103	30	0.291	0	0	0.9965	0.9904	T	73	M	0.212	0.385	1.56582e-10	1.46242e-09	0	62.4462	tgaccggaatCggcgagagcg
chr7	24650533	+	C	111	29	0.264	1	0.009	0.9954	1	T	81	M	0.19	0.353	4.43597e-10	3.7217e-09	0	51.6116	tgcccgaatcCtccatggggg
chr7	151064222	+	C	119	25	0.21	0	0	0.9972	0.9917	T	94	M	0.147	0.292	1.45777e-08	1.01633e-07	0	28.7089	agagcttgggCcctgggacgc
chr7	151064223	+	C	115	24	0.209	0	0	0.9972	0.9914	T	91	M	0.144	0.292	3.12315e-08	2.03416e-07	0	26.0187	gagcttgggcCctgggacgcc
chr7	151064224	+	C	115	23	0.2	0	0	0.9972	0.9914	T	92	M	0.137	0.282	7.02709e-08	3.99818e-07	0	22.5612	agcttgggccCtgggacgcct
chr7	25123741	-	C	41	19	0.463	0	0	0.9955	1	T	22	M	0.321	0.613	2.48258e-07	1.24129e-06	2.11933e-08	40.2293	gaagaaagggCagacttaata
chr7	38219598	+	C	25	14	0.56	0	0	0.9977	1	C	14	M	0.371	0.733	9.50562e-06	3.6475e-05	4.55711e-06	26.0612	tcagagagggCagcacttata
chr7	44050269	+	C	33	12	0.364	0	0	0.9972	1	T	21	M	0.222	0.534	0.00014415	0.000403132	3.20342e-08	10.2269	atccgcgtggCtggcacaggg
chr7	142864456	+	C	29	10	0.345	0	0	0.9972	0.9667	T	19	M	0.199	0.527	0.000383867	0.000964086	2.67907e-06	6.81132	gacacgggggCctgcctggcc
chr7	149296256	+	C	37	11	0.297	0	0	0.9971	1	T	26	M	0.175	0.458	0.000409104	0.00100251	2.44165e-08	6.51823	gcaaagggggCtttctgagga
chr7	99011119	+	C	32	10	0.312	0	0	0.9972	0.9697	T	22	M	0.18	0.486	0.000851797	0.00177907	1.36524e-08	5.51077	aaggagtgggCgctgcacacc
chr7	149198400	+	C	46	10	0.217	0	0	0.9971	1	T	36	M	0.123	0.356	0.00113065	0.00225673	5.43534e-11	3.61285	ccagatagggCacctgtcttc
chr7	74196603	+	C	25	9	0.36	0	0	0.9972	1	T	16	M	0.202	0.555	0.00163083	0.0031411	1.91826e-06	5.07979	ctatggggagCagtttggggg
chr7	44681767	+	C	29	9	0.31	0	0	0.9974	1	T	20	M	0.173	0.492	0.00188095	0.00354019	1.46132e-06	4.23777	ctggccagggCattgtgtacg
chr7	141659508	-	C	33	9	0.273	0	0	0.9976	1	T	24	M	0.151	0.442	0.00208391	0.00383471	3.92958e-09	3.63575	ttcaagagggCattttcaatt
chr7	4791534	+	C	33	8	0.242	0	0	0.9977	1	T	25	M	0.128	0.41	0.00241734	0.00431979	2.0926e-09	2.68607	cacagacacgCggggctggcc
chr7	44050273	+	C	25	8	0.32	0	0	0.9972	1	T	17	M	0.172	0.516	0.00402912	0.00673789	1.28158e-06	3.29619	gcgtggctggCacagggggtg
chr7	72945635	+	C	32	8	0.25	0	0	0.9972	1	T	24	M	0.133	0.421	0.00475278	0.00771353	4.57161e-09	2.46285	ctggagtgggCacatcaggca
chr7	72948484	-	C	35	8	0.229	0	0	0.9972	0.9722	T	27	M	0.121	0.39	0.00498622	0.00799877	4.00908e-09	2.22225	ttgcacatagCagaggctccg
chr7	100038450	+	C	37	8	0.216	0	0	0.9964	1	T	29	M	0.114	0.372	0.00512332	0.00799877	1.18825e-08	2.08639	gctaatggggCactgaaatgg
chr6	31644134	-	C	135	38	0.281	0	0	0.9972	0.9926	T	97	M	0.212	0.363	3.4913e-13	4.32048e-12	0	100.58	cggcccactcCtccacaggct
chr6	4428080	+	C	85	31	0.365	0	0	0.9978	1	T	54	M	0.27	0.471	3.23381e-11	3.26681e-10	0	87.8985	gtgctgtaggCttactttgtg
chr6	18258054	-	C	114	24	0.212	1	0.009	0.9965	1	T	89	M	0.147	0.297	3.04124e-08	2.00722e-07	0	26.5349	aggaaaggggCagaaactttg
chr6	34245747	+	C	35	20	0.571	0	0	0.9972	0.9459	C	20	M	0.409	0.72	4.01267e-08	2.5465e-07	3.07881e-07	60.4405	tcagatggggCaccaataaca
chr6	43505061	+	C	37	19	0.514	0	0	0.997	1	C	19	M	0.359	0.666	1.65027e-07	8.61231e-07	2.86386e-07	46.2561	gtgccactctCtgggtactgc
chr6	24495100	+	C	51	19	0.373	0	0	0.9975	0.9808	T	32	M	0.253	0.51	4.83819e-07	2.32515e-06	6.56941e-12	30.3821	gtccctgcctCcgggcctgcg
chr6	79215002	-	C	30	12	0.4	0	0	0.9979	1	T	18	M	0.246	0.577	0.000123618	0.000349039	2.11188e-06	11.5317	atacagagggCaaagatggat
chr6	34280149	-	C	21	9	0.429	0	0	0.9972	1	T	12	M	0.245	0.635	0.000659196	0.00143115	1.91826e-06	7.0054	ttccttttctCgaggtggatg
chr6	32972352	+	C	43	10	0.233	0	0	0.9972	1	T	33	M	0.132	0.377	0.00108297	0.00218803	4.67635e-11	3.90053	tcccagcgggCagtacagacc
chr6	7176749	+	C	35	9	0.257	0	0	0.9967	1	T	26	M	0.142	0.421	0.00217142	0.00395166	1.47645e-08	3.39474	ataaggagggCagcttgataa
chr6	32837983	-	C	24	8	0.333	0	0	0.9971	1	T	16	M	0.18	0.533	0.00389809	0.00665364	1.31472e-06	3.46377	gccctggtcgCgggggcctca
chr5	40832532	-	C	281	151	0.539	1	0.004	0.9927	0.986	C	151	M	0.481	0.597	1.93729e-54	1.1987e-52	0	3899.29	cccaagagggCagctgttgca
chr5	140401988	+	C	103	19	0.207	11	0.107	0.9965	0.981	T	73	M	0.136	0.3	1.35456e-06	6.04061e-06	0	15.207	atagcggaggCggcggcacct
chr5	112867590	+	C	73	18	0.281	9	0.123	0.9967	1	T	46	M	0.186	0.401	1.89948e-06	8.32073e-06	1.18572e-13	19.1482	tgaatggagaCttctaatttg
chr5	179766313	+	C	24	15	0.625	0	0	0.9972	1	C	15	M	0.427	0.788	2.39194e-06	1.0386e-05	9.25731e-06	36.0122	gcagacggggCcctcccacag
chr5	140550773	-	C	26	14	0.538	0	0	0.9979	1	C	14	M	0.355	0.712	1.0919e-05	4.06385e-05	3.08906e-06	24.6308	tcagaggaggCagccaatgaa
chr5	179729459	+	C	43	14	0.326	0	0	0.9972	1	T	29	M	0.205	0.475	3.45408e-05	0.000116311	3.67996e-10	12.8007	gctagcagggCatggcacgtg
chr5	134146263	+	C	40	12	0.3	0	0	1	0.9302	T	28	M	0.181	0.454	0.000185466	0.000507214	0	8.09399	ccggagaaggCcgctgcccca
chr5	178142713	+	C	38	10	0.263	0	0	0.998	1	T	28	M	0.15	0.42	0.000495255	0.00114817	3.60726e-09	4.94833	cccgagtgggCaaagccattg
chr5	6599910	-	C	49	11	0.229	1	0.02	0.9976	1	T	37	M	0.133	0.365	0.000512429	0.00116354	3.97804e-11	4.81659	cccaaggcagCgggggcccac
chr5	178055902	+	C	72	10	0.208	24	0.333	0.9909	0.96	T	38	M	0.117	0.343	0.00115971	0.00228258	1.52634e-08	3.44356	aggagaatgaCgattttgcgc
chr5	134139016	+	C	37	8	0.216	0	0	1	1	T	29	M	0.114	0.372	0.00512332	0.00799877	0	2.08639	cagcatggggCagctccccca
chr4	1245321	-	C	53	42	0.792	0	0	0.997	0.9815	C	42	M	0.665	0.88	2.37096e-19	4.89011e-18	3.65628e-09	520.527	gctgaacaaaCagggaaacgt
chr4	2043921	+	C	157	40	0.255	0	0	0.9979	1	T	117	M	0.193	0.328	1.0507e-13	1.33358e-12	0	100.214	gccagcggggCactgaggacc
chr4	1242207	-	C	34	18	0.529	0	0	0.997	1	C	18	M	0.367	0.685	3.46092e-07	1.6962e-06	2.47467e-07	42.7225	ttggccctctCaggggccccc
chr4	6716560	+	C	38	10	0.263	0	0	0.9953	1	T	28	M	0.15	0.42	0.000495255	0.00114817	9.76981e-08	4.94833	tcagcgagggCgtgccgcgca
chr4	177362293	+	C	27	10	0.37	0	0	0.995	1	T	17	M	0.215	0.558	0.000705059	0.00151084	1.48027e-05	6.78649	ctgcagtgggCagatttgtcc
chr4	102344477	-	C	36	9	0.25	0	0	0.9972	1	T	27	M	0.138	0.411	0.0011061	0.00222568	8.21014e-09	3.65839	cccgcgtgggCgtcccggagc
chr4	958319	+	C	26	9	0.346	0	0	0.9977	1	T	17	M	0.194	0.538	0.00169855	0.00324627	9.52829e-07	4.83928	tcagtgtgggCatcttccacc
chr4	37902324	+	C	37	9	0.273	4	0.108	0.9972	1	T	24	M	0.151	0.442	0.00208391	0.00383471	8.21014e-09	3.63575	gagatgtgaaCctgagccagg
chr4	113759409	-	C	21	8	0.381	0	0	0.9969	1	T	13	M	0.208	0.591	0.0034481	0.00600989	1.60258e-06	4.08777	tccaggggggCattctcagtg
chr4	169009974	-	C	37	8	0.216	0	0	0.9951	1	T	29	M	0.114	0.372	0.00512332	0.00799877	3.88667e-08	2.08639	ctggaaggggCcaaagccgcc
chr3	39408706	+	C	862	518	0.602	2	0.002	0.9972	0.9977	C	518	M	0.569	0.635	1.70307e-201	8.43018e-199	0	59198.9	gtgttatatcCtccaggaata
chr3	49104400	-	C	235	160	0.681	0	0	0.9972	1	C	160	M	0.619	0.737	2.92322e-67	2.06713e-65	0	6586.9	cctcccgactCagggataccc
chr3	9818796	+	C	174	53	0.305	0	0	0.9976	1	T	121	M	0.241	0.377	1.02185e-18	1.94545e-17	0	229.836	aggggctgagCagggtatccc
chr3	150546246	-	C	239	52	0.218	0	0	0.9959	0.9917	T	187	M	0.17	0.274	9.83804e-18	1.73922e-16	0	150.303	ctgagaacctCggcgctccgg
chr3	33865334	+	C	45	30	0.667	0	0	0.9978	0.9783	C	30	M	0.521	0.786	1.02466e-12	1.20764e-11	7.68226e-09	187.287	ccagtgggggCtgggactgct
chr3	48651455	-	C	40	20	0.5	0	0	0.9972	1	CT	20	M	0.352	0.648	3.89913e-08	2.50658e-07	2.80953e-09	52.1585	gcccacggggCtggtggggga
chr3	15051825	-	C	47	21	0.447	0	0	0.9959	1	T	26	M	0.314	0.588	5.27256e-08	3.22212e-07	2.36667e-08	48.0074	cagcctcactCaggcacgtac
chr3	129268528	+	C	32	14	0.438	0	0	0.9976	1	T	18	M	0.282	0.607	1.97024e-05	7.06716e-05	3.039e-08	18.5542	ctggagagggCtctgcagcag
chr3	53255841	-	C	38	13	0.342	0	0	0.9975	0.9268	T	25	M	0.212	0.501	7.09115e-05	0.000212734	2.88129e-08	11.442	ctgcggcgggCtctgggtgag
chr3	47009510	+	C	28	11	0.393	0	0	0.997	1	T	17	M	0.236	0.576	0.000288433	0.000739764	4.51203e-06	9.17627	ccgcccctcgCcggctgaggg
chr3	186787415	+	C	31	10	0.323	0	0	0.9973	1	T	21	M	0.186	0.499	0.000825011	0.00173779	1.03834e-08	5.7259	cagccagggaCgcttggtctc
chr3	12836092	-	C	45	10	0.222	0	0	0.9972	1	T	35	M	0.125	0.363	0.00111532	0.00223516	4.67635e-11	3.7039	aatgagtaggCagctcatgtg
chr3	58163323	+	C	26	9	0.346	0	0	0.9978	1	T	17	M	0.194	0.538	0.00169855	0.00324627	9.15395e-07	4.83928	tcgaagggggCaccacaggta
chr3	47850139	+	C	27	9	0.333	0	0	0.9972	1	T	18	M	0.186	0.522	0.00176265	0.00334295	1.91826e-06	4.62059	tctgctggggCtgtgtacaga
chr3	15206369	+	C	34	9	0.265	0	0	0.9968	0.9714	T	25	M	0.146	0.431	0.0021287	0.00388822	1.2321e-08	3.5111	ctccaccgtcCaaagtaaact
chr3	128620386	-	C	32	8	0.25	0	0	0.998	1	T	24	M	0.133	0.421	0.00475278	0.00771353	1.01873e-09	2.46285	ctccagggggCccagggtgcc
chr22	38485991	-	C	136	72	0.529	0	0	0.9971	0.9714	C	72	M	0.446	0.611	9.2623e-28	2.86553e-26	0	867.842	ttacatggggCagactgccta
chr22	42565069	-	C	48	30	0.625	0	0	0.9863	1	C	30	M	0.484	0.748	2.12864e-12	2.39472e-11	5.20909e-05	169.345	gagaacgtagCgtagtcatcc
chr22	19892596	+	C	22	21	0.955	0	0	0.9972	1	C	21	M	0.782	0.992	1.0931e-11	1.20242e-10	2.96039e-05	180.011	ccccggctttCcggggacaca
chr22	50221361	-	C	98	29	0.296	0	0	0.9976	0.98	T	69	M	0.215	0.393	3.26103e-10	2.78312e-09	0	59.0476	ctccgcctcgCgggagactct
chr22	29341541	-	C	50	21	0.438	2	0.04	0.9972	0.9804	T	27	M	0.307	0.577	5.70423e-08	3.44341e-07	3.67876e-09	46.7024	ggaggggggcCggggcgtcgt
chr22	29341542	-	C	50	21	0.429	1	0.02	0.9972	0.9804	T	28	M	0.3	0.567	6.14528e-08	3.59012e-07	3.67876e-09	45.4672	tggaggggggCcggggcgtcg
chr22	24164531	+	C	80	22	0.275	0	0	0.9972	1	T	58	M	0.189	0.381	8.93505e-08	5.02597e-07	1.33227e-15	29.3367	tgaaggtgtcCtccatgcttc
chr22	50197516	+	C	43	20	0.465	0	0	1	1	T	23	M	0.325	0.611	1.05016e-07	5.77587e-07	0	45.377	ttcaagagggCcatcgcagcg
chr22	17109520	+	C	27	15	0.6	2	0.074	1	0.931	C	15	M	0.407	0.766	2.90449e-06	1.22882e-05	0	33.8355	cccaggggggCtgcagtagac
chr22	19718590	+	C	26	13	0.5	0	0	0.9968	1	CT	13	M	0.321	0.679	3.27571e-05	0.000112602	9.56089e-06	18.6915	cgtgccctgtCcaggcctcac
chr22	37225635	-	C	34	13	0.382	0	0	0.9985	1	T	21	M	0.239	0.55	5.91662e-05	0.000179676	3.59998e-09	13.1362	agggatggggCtcttactccc
chr22	41577185	-	C	46	13	0.283	0	0	0.9983	1	T	33	M	0.173	0.425	9.11563e-05	0.000268586	1.82581e-11	9.09907	ccagatggggCcagagtctgt
chr22	37805591	+	C	36	11	0.306	0	0	0.9974	0.9474	T	25	M	0.18	0.469	0.000397583	0.000984019	1.43186e-08	6.73473	cccaagcgggCcaaggcctcc
chr22	17109523	+	C	26	10	0.385	0	0	1	0.9286	T	16	M	0.224	0.575	0.00067152	0.00144523	0	7.11639	aggggggctgCagtagacccg
chr22	36316565	-	C	49	10	0.204	0	0	0.9972	1	T	39	M	0.115	0.336	0.0011735	0.00229599	4.67635e-11	3.36474	agaggcagggCgcctccttca
chr22	37940902	+	C	22	8	0.364	0	0	0.9968	1	T	14	M	0.197	0.57	0.00360848	0.00624544	1.75843e-06	3.8561	ttgaagggggCgccctgctcc
chr21	8254318	+	C	96	32	0.333	0	0	0.9972	0.96	T	64	M	0.247	0.432	2.07594e-11	2.18637e-10	0	84.4557	aaggcagcagCcgaaaagatt
chr21	43688047	+	C	94	23	0.247	1	0.011	0.9963	1	T	70	M	0.171	0.344	5.04874e-08	3.16345e-07	0	28.6683	gcagagggggCgaacagccac
chr21	46411387	+	C	48	15	0.312	0	0	0.9972	0.9796	T	33	M	0.199	0.453	8.35728e-06	3.23192e-05	5.50684e-10	15.1923	tggcagtctgCagagcgagct
chr21	45495400	+	C	51	11	0.229	3	0.059	0.9972	1	T	37	M	0.133	0.365	0.000512429	0.00116354	8.55296e-11	4.81659	gaaaggggagCcgggagatgc
chr21	45495401	+	C	51	11	0.216	0	0	0.9972	1	T	40	M	0.125	0.346	0.000534665	0.00118681	2.44249e-13	4.49666	aaaggggagcCgggagatgcc
chr21	43756067	+	C	31	8	0.258	0	0	0.9973	1	T	23	M	0.137	0.432	0.00466637	0.00762327	3.90593e-09	2.55509	gctgtgagggCcccgccgctt
chr20	41174172	+	C	91	34	0.374	0	0	0.9972	0.9891	T	57	M	0.281	0.476	1.28863e-12	1.48342e-11	0	113.696	cctgcgggagCggggctcaga
chr20	62813700	+	C	63	19	0.302	0	0	0.9954	1	T	44	M	0.202	0.424	7.71251e-07	3.56794e-06	2.20568e-12	23.5045	gctgcaggggCtggggcctcc
chr20	63738822	+	C	42	15	0.357	0	0	0.9971	0.913	T	27	M	0.23	0.508	1.33244e-05	4.8497e-05	6.0916e-10	16.8119	gcagcacgtgCggggctggga
chr20	32848701	+	C	33	13	0.433	3	0.091	0.9958	0.9706	T	17	M	0.274	0.608	4.63569e-05	0.000148043	2.10319e-05	15.4245	atgaagggggCccacaggagg
chr20	62813706	+	C	64	14	0.222	1	0.016	0.9954	1	T	49	M	0.137	0.339	5.42593e-05	0.000168921	1.53322e-13	8.19614	ggggctggggCctccggagct
chr20	62813707	+	C	64	13	0.203	0	0	0.9954	1	T	51	M	0.123	0.317	0.000124103	0.000349039	7.70495e-14	6.23249	gggctggggcCtccggagctg
chr20	35742140	-	C	24	9	0.375	0	0	0.9967	1	T	15	M	0.212	0.573	0.00155924	0.00301493	3.09613e-06	5.3456	cccgcgtgggCttctctaatt
chr20	46062341	-	C	23	8	0.348	0	0	0.9967	1	T	15	M	0.188	0.551	0.00375816	0.00643699	2.02969e-06	3.64938	acagatggggCagccacaggc
chr2	43225483	-	C	56	23	0.411	0	0	0.997	0.9032	T	33	M	0.292	0.541	6.8457e-09	5.05764e-08	6.71749e-11	54.7706	cgtcggggggCggcggcacag
chr2	43225480	-	C	58	22	0.379	0	0	0.997	0.9062	T	36	M	0.266	0.508	2.02495e-08	1.37308e-07	4.9778e-11	44.9621	cggggggcggCggcacagccc
chr2	43225477	-	C	65	20	0.308	0	0	0.997	0.9155	T	45	M	0.209	0.428	3.38667e-07	1.6764e-06	1.54987e-13	27.0286	ggggcggcggCacagccctgc
chr2	197501160	+	C	52	18	0.346	0	0	0.9945	1	T	34	M	0.232	0.482	1.28534e-06	5.83711e-06	4.83392e-10	24.5486	ccaaaggaggCattatgcttc
chr2	127588500	+	C	83	17	0.243	13	0.157	0.9975	0.9881	T	53	M	0.158	0.355	5.05644e-06	2.03491e-05	0	14.182	ttagcagagaCcaagctgggc
chr2	113202702	+	C	31	15	0.484	0	0	0.9973	1	T	16	M	0.32	0.652	6.45957e-06	2.53769e-05	7.08183e-08	24.8877	caagagggggCctctgctacc
chr2	233207539	+	C	26	14	0.538	0	0	0.9972	1	C	14	M	0.355	0.712	1.0919e-05	4.06385e-05	8.22413e-06	24.6308	tcgaggtgggCagccatcacc
chr2	95832351	-	C	55	12	0.218	0	0	0.9959	0.9016	T	43	M	0.129	0.344	0.000249468	0.000656844	4.32998e-12	5.59727	gacctcccatCcggggcctct
chr2	172597982	+	C	26	10	0.385	0	0	0.9972	1	T	16	M	0.224	0.575	0.00067152	0.00144523	2.56724e-06	7.11639	tcagaggaggCatcctttgcc
chr2	241353481	+	C	27	9	0.333	0	0	0.9955	1	T	18	M	0.186	0.522	0.00176265	0.00334295	7.44738e-06	4.62059	tttgtgggggCtagaaaaaac
chr2	233275944	+	C	35	9	0.29	4	0.114	0.9806	1	T	22	M	0.161	0.466	0.00198753	0.00369859	1.66649e-05	3.91368	acacaggagaCtgacgagtgg
chr2	113246811	+	C	20	8	0.4	0	0	0.997	1	T	12	M	0.219	0.613	0.003276	0.00575043	0.000257193	4.34922	agagatgtcgCagggccttac
chr2	46904392	-	C	25	8	0.32	0	0	0.9979	1	T	17	M	0.172	0.516	0.00402912	0.00673789	4.96804e-07	3.29619	gcggcttttcCaggtgcacgg
chr2	55355739	-	C	29	8	0.32	4	0.138	0.9955	0.9667	T	17	M	0.172	0.516	0.00402912	0.00673789	5.06709e-06	3.29619	tatcatagaaCtctctgaaga
chr2	202635745	+	C	43	8	0.258	12	0.279	0.9957	0.9773	T	23	M	0.137	0.432	0.00466637	0.00762327	2.31155e-08	2.55509	agagccgaagCtcgccggaga
chr2	61178224	+	C	44	8	0.211	6	0.136	0.997	1	T	30	M	0.111	0.363	0.00518708	0.00799877	5.67326e-09	2.02452	gatgctgaggCcggtccccag
chr19	14566839	-	C	202	42	0.208	0	0	0.9954	1	T	160	M	0.158	0.269	4.2071e-14	5.95004e-13	0	88.5748	tgctcaagtgCaagcgtgaca
chr19	2099056	+	C	23	18	0.783	0	0	1	1	C	18	M	0.581	0.903	2.38734e-08	1.59694e-07	0	79.7065	agggaggcctCgggagaaggg
chr19	7682783	+	C	109	23	0.213	1	0.009	0.9974	0.9909	T	85	M	0.146	0.299	6.43015e-08	3.70107e-07	0	24.201	ttcgaggaggCagtcatcgct
chr19	15161491	-	C	93	20	0.215	0	0	0.9972	1	T	73	M	0.144	0.309	6.07722e-07	2.86497e-06	0	17.8717	ctctgtcctcCaggggccttc
chr19	49499643	+	C	91	19	0.209	0	0	0.9972	0.9891	T	72	M	0.138	0.303	1.33744e-06	6.01848e-06	0	15.3942	tgaggctggaCatcggcccgc
chr19	10829172	+	C	46	17	0.37	0	0	0.9972	1	T	29	M	0.245	0.514	2.48261e-06	1.0686e-05	1.12936e-09	23.3677	ctcaaggaggCgctcaacatc
chr19	40279384	-	C	34	16	0.471	0	0	0.9972	1	T	18	M	0.315	0.633	2.99947e-06	1.25825e-05	1.16713e-07	27.7926	agccaagcagCgagaggccca
chr19	49085628	+	C	20	13	0.65	0	0	0.9953	1	C	13	M	0.433	0.819	1.28843e-05	4.72425e-05	2.85709e-05	27.516	gcgaggagggCgctacgcggt
chr19	40590815	+	C	59	14	0.237	0	0	0.9976	1	T	45	M	0.147	0.36	5.09767e-05	0.000160723	5.02709e-13	8.83092	cctcatggggCtgtctcccca
chr19	38844054	-	C	41	13	0.317	0	0	0.9972	0.9762	T	28	M	0.196	0.47	7.89948e-05	0.000234146	2.08589e-10	10.4339	ctcaatggggCtgatatctat
chr19	45687549	-	C	35	10	0.286	0	0	0.9978	0.9722	T	25	M	0.163	0.451	0.000462761	0.0011066	4.82163e-09	5.44426	caagtaggggCcgcctgtctg
chr19	35633811	+	C	46	11	0.239	0	0	0.9981	0.9787	T	35	M	0.139	0.379	0.000496381	0.00114817	1.0775e-11	5.05647	gccgtgggggCaggaggtgcc
chr19	8468784	+	C	46	11	0.239	0	0	0.9968	1	T	35	M	0.139	0.379	0.000496381	0.00114817	1.47155e-10	5.05647	gatgagagggCcttaccaaaa
chr19	811390	+	C	30	10	0.333	0	0	0.9972	1	T	20	M	0.192	0.512	0.000797013	0.00168599	1.36524e-08	5.95857	cccaggcgggCtccccgctgc
chr19	44990432	+	C	41	10	0.244	0	0	0.9973	1	T	31	M	0.138	0.393	0.00104811	0.00212629	3.46008e-11	4.11925	ccctggagggCctgtccgtgc
chr19	6414402	-	C	24	9	0.375	0	0	0.9979	0.96	T	15	M	0.212	0.573	0.00155924	0.00301493	7.76125e-07	5.3456	ggagacagggCagctccccta
chr19	55347772	+	C	33	9	0.273	0	0	0.9975	0.9706	T	24	M	0.151	0.442	0.00208391	0.00383471	4.91468e-09	3.63575	ccataaggggCaggggccacc
chr19	40367744	+	C	43	9	0.209	0	0	0.9972	1	T	34	M	0.114	0.352	0.0024526	0.00435139	2.34375e-11	2.68358	tccccaatgcCtccacgggga
chr19	1555854	-	C	22	8	0.364	0	0	0.9969	0.9167	T	14	M	0.197	0.57	0.00360848	0.00624544	1.72549e-06	3.8561	tcccaggcggCgccgccttct
chr19	41896470	+	C	27	8	0.32	2	0.074	0.9945	0.9643	T	17	M	0.172	0.516	0.00402912	0.00673789	9.11235e-06	3.29619	gacgagggggCcgaaaccgag
chr18	59345934	-	C	45	11	0.244	0	0	0.9967	1	T	34	M	0.142	0.387	0.000487954	0.00114817	1.79498e-10	5.18562	ccaccccgacCtccaagggca
chr17	47974726	+	C	92	54	0.587	0	0	0.9955	0.9787	C	54	M	0.485	0.682	1.38031e-21	3.1057e-20	6.17284e-14	546.134	tcttggttagCgggagtgtgc
chr17	35258858	+	C	64	21	0.328	0	0	0.9968	1	T	43	M	0.226	0.45	1.33603e-07	7.1884e-07	3.74034e-13	32.5821	ctggtgggggCataatcaagg
chr17	7258639	+	C	25	17	0.68	0	0	0.9966	1	C	17	M	0.484	0.828	2.19668e-07	1.12098e-06	2.57229e-05	54.7952	ccaagaggggCcctctgtaga
chr17	7224980	+	C	36	18	0.5	0	0	0.9973	0.9231	CT	18	M	0.345	0.655	4.38073e-07	2.12594e-06	1.69232e-07	39.4563	tccgagagggCatggccgccc
chr17	38799390	-	C	91	20	0.22	0	0	0.9972	0.9785	T	71	M	0.147	0.315	5.90771e-07	2.81185e-06	0	18.3145	acggcggtggCggtggcgccg
chr17	82439944	+	C	21	15	0.714	0	0	0.9972	1	C	15	M	0.5	0.862	1.09988e-06	5.04112e-06	1.02582e-05	44.7285	gagagtgacgCgggaggcacc
chr17	75777945	-	C	66	17	0.258	0	0	0.9972	1	T	49	M	0.167	0.374	4.68167e-06	1.91523e-05	2.88658e-14	15.1749	cacttgttctCatagtagtaa
chr17	17813590	-	C	99	17	0.205	16	0.162	0.9972	1	T	66	M	0.132	0.304	6.13256e-06	2.42849e-05	0	11.6963	tggcacagagCttccggcccg
chr17	75318971	-	C	33	14	0.424	0	0	0.9957	1	T	19	M	0.272	0.592	2.11541e-05	7.48401e-05	3.41329e-07	17.824	ctcaccgtctCgggggttgtg
chr17	50551110	+	C	43	14	0.326	0	0	0.9979	1	T	29	M	0.205	0.475	3.45408e-05	0.000116311	7.41881e-11	12.8007	ttgctcaattCagggctggag
chr17	78224038	+	C	60	14	0.233	0	0	0.9971	1	T	46	M	0.144	0.354	5.18242e-05	0.00016236	6.43929e-15	8.66316	cctcagaggaCagtttttttg
chr17	7229605	-	C	87	14	0.215	22	0.253	0.9968	1	T	51	M	0.133	0.33	5.57982e-05	0.000171553	1.24345e-14	7.91184	gaagcagaggCcaccccgcct
chr17	68101659	+	C	38	12	0.316	0	0	0.9972	1	T	26	M	0.191	0.475	0.000174551	0.000480016	3.20342e-08	8.60649	cagtcctgctCccgtgccgcc
chr17	82929772	+	C	31	11	0.355	0	0	0.9972	1	T	20	M	0.211	0.531	0.000333178	0.000841444	2.14049e-08	8.07716	agcgtcccctCggggttcaat
chr17	80381662	+	C	39	11	0.282	0	0	0.9972	1	T	28	M	0.165	0.438	0.000430936	0.0010508	2.14049e-08	6.12458	gccgacgagaCcatcggcgtg
chr17	42544010	+	C	21	10	0.476	0	0	0.9954	0.9545	T	11	M	0.283	0.676	0.000479415	0.00113546	1.15727e-05	9.4081	ggttggtggcCaactactaca
chr17	16068037	-	C	37	10	0.27	0	0	0.9974	0.9737	T	27	M	0.154	0.43	0.000969729	0.00199177	9.15199e-09	4.63974	ccagcgaagtCtccagtgcct
chr17	73209572	-	C	41	9	0.231	2	0.049	0.9976	1	T	30	M	0.126	0.383	0.00116204	0.00228258	4.14041e-09	3.3401	ctgagggaggCccacttccac
chr17	18236840	+	C	40	9	0.225	0	0	0.9979	1	T	31	M	0.123	0.375	0.00235825	0.00424484	5.5258e-12	2.91232	tctaggtgggCtgcttcgatc
chr17	42544009	+	C	21	8	0.381	0	0	0.9954	0.9545	T	13	M	0.208	0.591	0.0034481	0.00600989	5.43818e-06	4.08777	gggttggtggCcaactactac
chr17	50150761	-	C	28	8	0.296	1	0.036	0.9972	0.9032	T	19	M	0.159	0.485	0.00426746	0.00706487	1.28158e-06	3.00549	tgaagcggggCtggctgtctt
chr17	29628634	-	C	38	8	0.211	0	0	1	1	T	30	M	0.111	0.363	0.00518708	0.00799877	0	2.02452	aggcttgagaCagggttatgg
chr16	68359322	-	C	195	75	0.387	1	0.005	0.9943	0.9898	T	119	M	0.321	0.457	3.30442e-25	9.08717e-24	0	589.206	cggcccacccCtccaaggggc
chr16	21972062	+	C	60	40	0.667	0	0	0.9967	1	C	40	M	0.541	0.773	7.31837e-17	1.16858e-15	7.09606e-11	348.894	tcaagaggggCagcaacacca
chr16	88655363	-	C	146	32	0.219	0	0	0.9976	1	T	114	M	0.16	0.293	3.45228e-11	3.41776e-10	0	53.4807	ccgctgcatcCgggagcgaga
chr16	3850451	-	C	101	25	0.248	0	0	0.9968	0.9712	T	76	M	0.174	0.34	1.09375e-08	7.96188e-08	0	34.5605	tctcttggggCtgctggcaga
chr16	2175896	+	C	47	21	0.447	0	0	0.9972	1	T	26	M	0.314	0.588	5.27256e-08	3.22212e-07	3.67876e-09	48.0074	gcagcgtctaCtccattgctg
chr16	3850444	-	C	105	23	0.219	0	0	0.9968	0.9722	T	82	M	0.151	0.307	6.16485e-08	3.59012e-07	0	24.9793	gggctgctggCagaggaaggg
chr16	1445764	-	C	71	21	0.296	0	0	0.9973	0.9221	T	50	M	0.202	0.41	1.6795e-07	8.65993e-07	4.44089e-16	28.7854	accccggcctCgagggtgacc
chr16	30739346	+	C	21	16	0.762	0	0	0.9972	1	C	16	M	0.549	0.894	2.44418e-07	1.23456e-06	1.25986e-05	58.0875	gcgggccaggCgggttggaat
chr16	70398763	-	C	98	18	0.217	15	0.153	0.9962	1	T	65	M	0.142	0.317	2.71644e-06	1.15917e-05	0	14.2081	cccgatgaagCcctaagcagg
chr16	1787782	+	C	70	15	0.25	10	0.143	0.9973	1	T	45	M	0.158	0.372	2.24897e-05	7.89533e-05	5.9952e-15	10.9993	accatagaagCcctgcgtccc
chr16	67843157	+	C	64	14	0.219	0	0	0.9972	1	T	50	M	0.135	0.334	5.50369e-05	0.00017027	5.10703e-15	8.05147	ccgcagagggCgcagccgctg
chr16	67842755	+	C	67	14	0.209	0	0	0.9972	0.9437	T	53	M	0.129	0.321	5.72735e-05	0.000175002	5.10703e-15	7.64663	acttccagggCggccgcaaga
chr16	85602	+	C	58	13	0.241	4	0.069	0.9969	1	T	41	M	0.146	0.369	0.000107627	0.000313384	1.60561e-12	7.55419	caggatgaagCtgtatggctg
chr16	28832353	+	C	43	11	0.256	0	0	0.9982	0.9773	T	32	M	0.149	0.402	0.000470235	0.00111907	9.55958e-12	5.46482	ctggagtgggCtccatttctc
chr16	31094592	-	C	49	11	0.229	1	0.02	0.9975	1	T	37	M	0.133	0.365	0.000512429	0.00116354	4.08808e-11	4.81659	gcgacgtgggCaccgccatca
chr16	11915775	-	C	42	10	0.238	0	0	0.9972	1	T	32	M	0.135	0.385	0.000532933	0.00118681	4.67635e-11	4.41271	tccggccgggCgcccctgcct
chr16	30365206	-	C	52	10	0.238	10	0.192	0.9935	0.9811	T	32	M	0.135	0.385	0.000532933	0.00118681	2.85448e-09	4.41271	ttaggtgaagCtgcgctgccg
chr16	30085023	+	C	31	10	0.333	1	0.032	0.9979	1	T	20	M	0.192	0.512	0.000797013	0.00168599	3.93214e-09	5.95857	agacacggggCatcccctcca
chr16	69118664	-	C	46	10	0.25	6	0.13	0.9996	1	T	30	M	0.142	0.402	0.00102966	0.00209745	3.44169e-15	4.23808	ggcatgtgaaCtgtggcaggt
chr16	2769079	+	C	29	9	0.31	0	0	0.998	0.9355	T	20	M	0.173	0.492	0.00188095	0.00354019	6.30541e-07	4.23777	acggaagaggCgctctagcag
chr16	2088992	-	C	31	9	0.29	0	0	0.9972	0.9688	T	22	M	0.161	0.466	0.00198753	0.00369859	8.21014e-09	3.91368	caggtctgggCaagtagcagg
chr16	67611242	+	C	38	9	0.237	0	0	0.9963	1	T	29	M	0.13	0.392	0.00228842	0.00413419	2.3039e-08	3.08781	cttcagggggCttatgaaaat
chr16	57751994	+	C	23	8	0.348	0	0	0.9973	1	T	15	M	0.188	0.551	0.00375816	0.00643699	1.03329e-06	3.64938	tcacacggggCctgtcaacgt
chr15	69455489	+	C	106	76	0.717	0	0	0.9988	1	C	76	M	0.625	0.794	6.68078e-33	2.20466e-31	0	1527.85	atgacatgggCtttggtcttt
chr15	24977876	+	C	162	34	0.21	0	0	0.9972	0.9939	T	128	M	0.154	0.279	1.68056e-11	1.80843e-10	0	56.5091	caggacggggCactccgcccc
chr15	90882311	+	C	38	24	0.632	0	0	0.9962	0.9744	C	24	M	0.473	0.766	5.13293e-10	4.23467e-09	2.01945e-06	105.42	gaggccacctCtccaagggct
chr15	98648776	+	C	89	22	0.247	0	0	0.9972	0.9674	T	67	M	0.169	0.346	1.0847e-07	5.90031e-07	0	25.9378	ccctcccgcgCgggggcagct
chr15	83164055	-	C	41	12	0.293	0	0	0.9972	1	T	29	M	0.176	0.445	0.000190677	0.0005186	1.46274e-10	7.86003	tcccagagggCgctgtgaagc
chr15	30941699	+	C	55	12	0.218	0	0	0.9972	1	T	43	M	0.129	0.344	0.000249468	0.000656844	4.87166e-13	5.59727	ctccagggggCcactgcgctg
chr15	85543895	+	C	36	8	0.222	0	0	0.9972	1	T	28	M	0.117	0.381	0.00505645	0.00799877	4.57161e-09	2.15218	caggaaggggCgacgcctgtg
chr14	20343234	-	C	913	332	0.365	4	0.004	0.9896	0.9892	T	577	M	0.335	0.397	2.7471e-101	3.39954e-99	0	11169.8	tcagactgggCaggagatgcc
chr14	49586019	-	C	1148	311	0.272	4	0.003	0.9972	0.9948	T	833	M	0.247	0.298	1.11786e-98	1.10668e-96	0	7520.28	acggtctgatCcggaaatatg
chr14	49853853	-	C	396	147	0.419	45	0.114	0.9763	0.9519	T	204	M	0.368	0.471	3.30591e-42	1.48766e-40	0	2246.02	ctggaggatcCcttgagttca
chr14	23346869	-	C	62	17	0.274	0	0	0.9979	1	T	45	M	0.179	0.396	4.28473e-06	1.76745e-05	2.9976e-15	16.3176	ggcccagcgcCtccacatggg
chr14	22834290	+	C	26	14	0.538	0	0	0.9977	1	C	14	M	0.355	0.712	1.0919e-05	4.06385e-05	4.44225e-06	24.6308	cccaaaggggCttcactgaag
chr14	20343108	-	C	44	14	0.318	0	0	0.9896	0.9565	T	30	M	0.2	0.466	3.57451e-05	0.000119553	2.27615e-07	12.4505	ccgcaggggaCctcataaccc
chr14	100292335	-	C	57	14	0.292	9	0.158	0.9975	0.9828	T	34	M	0.182	0.432	4.03116e-05	0.000133921	2.02567e-10	11.2228	gagggcgaggCtgtgcccgcc
chr14	105447903	+	C	35	12	0.343	0	0	0.9973	0.9722	T	23	M	0.208	0.508	0.000156868	0.000436234	2.65084e-08	9.51032	cagctgatccCagggacaggt
chr14	100142851	+	C	47	10	0.213	0	0	0.9972	1	T	37	M	0.12	0.349	0.00114543	0.00227706	4.67635e-11	3.52617	ccaggcatagCtgggtcagaa
chr14	103682487	+	C	43	9	0.237	5	0.116	0.9972	0.9556	T	29	M	0.13	0.392	0.00228842	0.00413419	8.21014e-09	3.08781	tagtttgagaCcagcttggcc
chr14	31207110	-	C	23	8	0.348	0	0	0.9972	0.9583	T	15	M	0.188	0.551	0.00375816	0.00643699	1.28158e-06	3.64938	gcgcagctccCgggagagccg
chr14	64946659	-	C	26	8	0.308	0	0	0.9969	1	T	18	M	0.165	0.5	0.00415202	0.00692003	1.64813e-06	3.14411	ttccttactcCtccaaaaaga
chr14	76171924	+	C	34	8	0.235	0	0	1	1	T	26	M	0.124	0.4	0.00491239	0.00792062	0	2.29704	cccaagtgggCtcctgatcat
chr14	100239333	+	C	39	8	0.216	2	0.051	0.9916	0.9286	T	29	M	0.114	0.372	0.00512332	0.00799877	3.45511e-07	2.08639	gaggtggagaCcatcccggtg
chr13	45337237	-	C	54	18	0.333	0	0	0.9972	0.9818	T	36	M	0.222	0.466	1.39204e-06	6.1523e-06	9.64562e-12	23.4455	ggagtggaggCattgttttta
chr13	48253908	+	C	38	14	0.368	0	0	0.997	0.9744	T	24	M	0.234	0.527	2.81395e-05	9.74058e-05	8.39919e-08	14.8979	ctaggaggagCatacttgtac
chr13	110914890	-	C	40	8	0.2	0	0	0.9972	1	T	32	M	0.105	0.348	0.00530605	0.00813157	1.04414e-11	1.91117	cgggcttctcCagcgaggagc
chr12	76559476	-	C	128	70	0.547	0	0	0.9943	0.9922	C	70	M	0.461	0.63	2.93291e-27	8.53994e-26	2.22045e-16	855.328	tagacgcttaCggggcctcgg
chr12	98503540	+	C	26	26	1	0	0	0.9972	0.9286	C	26	M	0.871	1	4.03292e-15	6.04938e-14	5.72584e-05	326.075	ccgcctgtcaCgcgggagacc
chr12	98503550	+	C	26	24	0.96	1	0.038	0.9972	0.9286	C	24	M	0.805	0.993	4.11358e-13	4.96639e-12	4.4764e-05	239.161	cgcgggagacCggggttcaat
chr12	113097146	+	C	81	31	0.383	0	0	0.9972	0.9878	T	50	M	0.284	0.492	2.62625e-11	2.70831e-10	2.22045e-16	93.3043	cctgagagggCcaagcagaga
chr12	120438427	+	C	119	32	0.269	0	0	0.9972	1	T	87	M	0.197	0.355	4.17682e-11	4.05397e-10	0	65.5605	cccggggtggCagtcagcatg
chr12	98503549	+	C	26	21	0.808	0	0	0.9972	0.9286	C	21	M	0.621	0.915	6.85238e-10	5.56053e-09	2.96039e-05	119.555	acgcgggagaCcggggttcaa
chr12	56731377	-	C	24	20	0.833	0	0	1	0.96	C	20	M	0.641	0.933	1.26986e-09	9.82159e-09	0	114.133	acttgggaggCtgaggcagga
chr12	56731371	-	C	24	20	0.833	0	0	1	0.96	C	20	M	0.641	0.933	1.26986e-09	9.82159e-09	0	114.133	gaggctgaggCaggagaattg
chr12	68648763	+	C	50	14	0.28	0	0	0.9941	1	T	36	M	0.175	0.417	4.2449e-05	0.000139154	1.39134e-08	10.6958	gctcaggaggCgttggaaagt
chr12	101698072	+	C	30	13	0.433	0	0	0.9965	1	T	17	M	0.274	0.608	4.63569e-05	0.000148043	1.23748e-05	15.4245	cctgctggggCtcgccgtcaa
chr12	55719586	+	C	42	12	0.286	0	0	0.9974	1	T	30	M	0.172	0.436	0.000195731	0.000523713	8.74074e-11	7.63927	ctacaaagggCagctgcagtc
chr12	56282574	-	C	37	11	0.297	0	0	0.9972	0.9737	T	26	M	0.175	0.458	0.000409104	0.00100251	2.14049e-08	6.51823	gcaaagagggCagctctgcct
chr12	46187474	-	C	42	11	0.262	0	0	0.9986	1	T	31	M	0.153	0.411	0.000460915	0.0011066	2.21645e-12	5.61604	ctaagtggggCcatcccatgt
chr12	98549208	+	C	30	10	0.333	0	0	0.9972	1	T	20	M	0.192	0.512	0.000797013	0.00168599	1.36524e-08	5.95857	aagaggtgggCattatgatta
chr12	54239396	-	C	41	9	0.22	0	0	0.9972	1	T	32	M	0.12	0.367	0.002391	0.0042882	2.34375e-11	2.83185	tagcagtgggCatgtaaactg
chr12	132062114	+	C	45	9	0.2	0	0	0.9972	1	T	36	M	0.109	0.338	0.00250948	0.0044364	2.34375e-11	2.55007	ttctagacgcCgggaggctct
chr12	48937436	-	C	25	8	0.32	0	0	0.9987	1	T	17	M	0.172	0.516	0.00402912	0.00673789	1.32643e-07	3.29619	ctgcagggggCacttgttcct
chr12	79822188	-	C	36	8	0.222	0	0	0.9972	1	T	28	M	0.117	0.381	0.00505645	0.00799877	4.57161e-09	2.15218	ctacgtagggCcaaacagcct
chr12	132045422	+	C	36	8	0.222	0	0	0.9972	1	T	28	M	0.117	0.381	0.00505645	0.00799877	4.57161e-09	2.15218	gcagagagggCaaggagcaga
chr12	132853488	-	C	39	8	0.216	2	0.051	0.9972	1	T	29	M	0.114	0.372	0.00512332	0.00799877	4.57161e-09	2.08639	cgagggcgagCcaggagcccc
chr11	75404677	+	C	1449	554	0.383	1	0.001	0.9972	0.9945	T	894	M	0.358	0.408	4.24876e-187	1.05157e-184	0	36953.6	tctaggtgtgCtgggcatcaa
chr11	118409077	+	C	186	95	0.511	0	0	0.9939	0.9947	C	95	M	0.439	0.582	2.42739e-34	9.24276e-33	0	1403.26	gcaagcggggCatcattggct
chr11	67432774	+	C	100	50	0.5	0	0	0.9962	0.9709	CT	50	M	0.404	0.596	4.44594e-19	8.80296e-18	0	370.555	cctgggccatCtccactccca
chr11	85484119	+	C	139	43	0.316	3	0.022	0.9972	0.9586	T	93	M	0.244	0.398	4.34564e-15	6.32675e-14	0	150.681	tacaagagggCgtgaaaccgt
chr11	65778163	-	C	50	33	0.66	0	0	0.9954	1	C	33	M	0.522	0.776	6.68316e-14	8.94098e-13	9.57553e-09	226.751	ccagagggggCcgggctgggc
chr11	65778162	-	C	50	33	0.66	0	0	0.9954	1	C	33	M	0.522	0.776	6.68316e-14	8.94098e-13	9.57553e-09	226.751	cagagggggcCgggctgggct
chr11	65120699	-	C	35	23	0.657	0	0	0.9972	0.9722	C	23	M	0.492	0.792	9.31511e-10	7.43707e-09	5.58868e-07	102.092	agaagaagggCcccaatgcca
chr11	119017519	-	C	111	27	0.243	0	0	0.9986	1	T	84	M	0.173	0.331	2.46088e-09	1.87405e-08	0	40.1874	aagttcgggaCaagctcaata
chr11	119094491	-	C	114	25	0.221	1	0.009	0.9969	0.9048	T	88	M	0.155	0.306	1.33995e-08	9.47539e-08	0	30.4256	ccgaggtgggCagtccaggcc
chr11	64288441	+	C	27	18	0.667	0	0	0.9955	1	C	18	M	0.478	0.814	9.6709e-08	5.37876e-07	7.03234e-05	60.3839	tgggcttcttCcgggtgcacc
chr11	66068715	+	C	67	17	0.254	0	0	0.9965	0.9853	T	50	M	0.165	0.369	4.77742e-06	1.93838e-05	1.16573e-13	14.9138	gccgtgggggCagcaagaaat
chr11	119018331	-	C	49	16	0.327	0	0	0.9986	1	T	33	M	0.212	0.466	7.06492e-06	2.75365e-05	2.62821e-11	17.4779	ttttgtccgaCatcttgacga
chr11	65778158	-	C	52	14	0.28	2	0.038	0.9954	1	T	36	M	0.175	0.417	4.2449e-05	0.000139154	4.03406e-09	10.6958	gggggccgggCtgggcttctt
chr11	3827134	-	C	27	12	0.444	0	0	0.9985	1	T	15	M	0.276	0.627	5.06808e-05	0.000160723	6.95736e-07	14.2181	tctctcccttCtccaatgagg
chr11	65079503	-	C	49	12	0.286	7	0.143	0.9976	1	T	30	M	0.172	0.436	0.000195731	0.000523713	6.02694e-11	7.63927	gggcagaagaCttgtccggag
chr11	10306601	+	C	25	11	0.44	0	0	0.9958	0.9615	T	14	M	0.267	0.629	0.000238659	0.000635141	1.23445e-05	10.6247	gcacacggggCtccagccccc
chr11	2396935	+	C	31	11	0.355	0	0	0.9981	1	T	20	M	0.211	0.531	0.000333178	0.000841444	4.00529e-09	8.07716	tccgagggggCcatcaccgcc
chr11	22625342	-	C	48	11	0.229	0	0	0.9992	1	T	37	M	0.133	0.365	0.000512429	0.00116354	1.4666e-13	4.81659	gaacccaaatCtccaggagga
chr11	67433393	+	C	22	10	0.455	0	0	0.9962	1	T	12	M	0.269	0.653	0.000521225	0.00117811	6.32622e-06	8.83777	tcatcaggggCaagctggcac
chr11	67490162	+	C	45	10	0.238	3	0.067	0.9979	1	T	32	M	0.135	0.385	0.000532933	0.00118681	1.12355e-11	4.41271	gtgaaggaggCtgctgccaag
chr11	65506021	+	C	32	10	0.312	0	0	0.9972	1	T	22	M	0.18	0.486	0.000851797	0.00177907	1.36524e-08	5.51077	tcagtagggtCatgaaggttt
chr11	490937	+	C	23	9	0.391	0	0	1	1	T	14	M	0.222	0.592	0.00148349	0.00289104	0	5.64093	cctcaggaacCagggtcctcc
chr11	66868899	-	C	43	9	0.209	0	0	0.9973	1	T	34	M	0.114	0.352	0.0024526	0.00435139	1.76191e-11	2.68358	actacttcatCgaggtcaact
chr11	85664491	-	C	31	8	0.267	1	0.032	0.9978	1	T	22	M	0.142	0.444	0.00457506	0.00752377	1.53525e-09	2.65451	ctcgccggggCctctctcctc
chr11	61119432	+	C	41	8	0.211	3	0.073	0.9983	1	T	30	M	0.111	0.363	0.00518708	0.00799877	5.90151e-10	2.02452	gcaggcagagCccaagaccca
chr10	104267412	+	C	20	16	0.8	0	0	0.9954	1	C	16	M	0.584	0.919	1.54171e-07	8.2059e-07	0.00247437	63.6489	ctgaagggggCaggagtcagc
chr10	97498275	-	C	42	16	0.381	0	0	0.9976	1	T	26	M	0.25	0.532	5.2139e-06	2.08136e-05	3.24722e-10	21.1309	caggtggctgCaggtacggca
chr10	128104207	-	C	29	12	0.414	0	0	0.998	0.9667	T	17	M	0.255	0.593	0.000116385	0.00033301	1.63066e-06	12.0445	tagcaggaggCagctgagaac
chr10	78035642	+	C	42	12	0.286	0	0	0.9977	0.9767	T	30	M	0.172	0.436	0.000195731	0.000523713	5.13745e-11	7.63927	ttggtggtggCaagacaactg
chr10	77830290	-	C	38	10	0.286	3	0.079	0.9983	1	T	25	M	0.163	0.451	0.000462761	0.0011066	1.69594e-09	5.44426	tgtgaatgagCcttgtttccc
chr10	70566738	+	C	21	9	0.429	0	0	0.9974	1	T	12	M	0.245	0.635	0.000659196	0.00143115	1.46326e-06	7.0054	ctgtagggggCcttactccct
chr10	14520308	-	C	40	8	0.2	0	0	0.9972	1	T	32	M	0.105	0.348	0.00530605	0.00813157	1.04414e-11	1.91117	cttttcatttCtccaagagga
chr1	44778634	+	C	715	157	0.221	4	0.006	0.9972	0.9944	T	554	M	0.192	0.253	2.68264e-48	1.47545e-46	0	1433.03	tgctagagggCaaagagttgg
chr1	109100508	+	C	174	91	0.523	0	0	0.9901	0.9943	C	91	M	0.449	0.596	4.44349e-33	1.57109e-31	0	1322.12	cccgaggtccCggagctggcc
chr1	158256896	+	C	190	63	0.332	0	0	0.9954	0.9896	T	127	M	0.269	0.401	4.43811e-22	1.04613e-20	0	361.271	gatgtggatgCggggtgagca
chr1	111238865	+	C	218	51	0.234	0	0	0.9975	0.9954	T	167	M	0.183	0.294	3.22095e-17	5.49783e-16	0	153.629	accgtgggggCccctgcctct
chr1	32334484	-	C	69	42	0.609	0	0	0.9963	0.9857	C	42	M	0.491	0.715	4.50565e-17	7.43433e-16	2.4276e-10	336.912	aaggaaggggCtattgcctcc
chr1	158329538	-	C	232	49	0.211	0	0	0.9953	0.9957	T	183	M	0.164	0.268	3.00215e-15	4.64395e-14	0	116.423	gatgtggatgCggggtgagca
chr1	158355937	+	C	64	28	0.438	0	0	0.9966	1	T	36	M	0.323	0.559	1.65103e-10	1.51345e-09	6.01097e-12	88.4537	gatgtggatgCggggtgagca
chr1	16396655	+	C	50	26	0.52	0	0	0.9976	1	C	26	M	0.385	0.652	1.73746e-10	1.56372e-09	4.65959e-09	97.7276	agatacgtttCggagtggttg
chr1	42766676	-	C	84	25	0.301	1	0.012	0.9969	1	T	58	M	0.213	0.407	3.53868e-09	2.65401e-08	0	45.0247	gcccaggcctCgggcgccgcc
chr1	43360561	+	C	76	24	0.32	1	0.013	0.9978	0.987	T	51	M	0.225	0.432	1.32816e-08	9.47539e-08	4.44089e-16	42.6154	cccgagtgggCtccctaagct
chr1	183553064	+	C	26	15	0.577	0	0	1	1	C	15	M	0.389	0.745	3.44811e-06	1.4343e-05	0	31.9128	ccacagagggCccaggcccct
chr1	186352011	-	C	26	14	0.538	0	0	0.9972	1	C	14	M	0.355	0.712	1.0919e-05	4.06385e-05	8.22413e-06	24.6308	acaaagggggCaaaacttact
chr1	28201166	-	C	74	16	0.216	0	0	0.9961	0.925	T	58	M	0.138	0.323	1.23121e-05	4.54812e-05	6.66134e-16	10.8172	ctcccacttcCaccccaacat
chr1	32668303	+	C	22	13	0.591	0	0	0.9984	1	C	13	M	0.387	0.767	1.91627e-05	6.92374e-05	1.08842e-06	23.7551	gtaaacagggCccgttatatg
chr1	24902330	-	C	57	15	0.263	0	0	0.9972	0.9661	T	42	M	0.166	0.39	2.11669e-05	7.48401e-05	2.61968e-12	11.6711	tccatggtggCcggcagcagc
chr1	156213124	+	C	65	14	0.264	12	0.185	0.9961	1	T	39	M	0.164	0.396	4.54824e-05	0.000148043	1.0941e-11	9.99221	gagggtgaagCtcctcgacac
chr1	10417495	+	C	31	13	0.433	1	0.032	0.997	1	T	17	M	0.274	0.608	4.63569e-05	0.000148043	7.54602e-06	15.4245	ggagagggggCtgcatcatta
chr1	156312060	-	C	40	13	0.325	0	0	0.9987	0.9756	T	27	M	0.201	0.48	7.63684e-05	0.000227725	5.1319e-12	10.7495	ctccggggggCtagcaaagag
chr1	248850173	-	C	52	13	0.25	0	0	0.998	1	T	39	M	0.152	0.382	0.000103818	0.000304084	1.03917e-13	7.88894	agccagactcCagggactgaa
chr1	24902326	-	C	59	13	0.22	0	0	0.9972	0.9672	T	46	M	0.134	0.341	0.00011636	0.00033301	9.02611e-13	6.82988	tggtggccggCagcagcagtg
chr1	35565373	+	C	29	12	0.414	0	0	0.9964	1	T	17	M	0.255	0.593	0.000116385	0.00033301	9.71446e-06	12.0445	ggccgacctgCaggagctctg
chr1	24902329	-	C	57	12	0.211	0	0	0.9972	0.9661	T	45	M	0.125	0.333	0.000256121	0.000670793	4.87166e-13	5.37631	ccatggtggcCggcagcagca
chr1	156743366	-	C	60	12	0.2	0	0	0.9951	0.9677	T	48	M	0.118	0.318	0.000265461	0.000691596	5.07372e-14	5.0758	ggcctgcaaaCtgggaacccc
chr1	40983362	+	C	27	11	0.407	0	0	0.9974	1	T	16	M	0.245	0.593	0.000272409	0.000702305	2.83374e-06	9.61277	gcagtgtgggCacaatactca
chr1	26556672	+	C	30	11	0.367	0	0	0.9972	1	T	19	M	0.219	0.545	0.000318805	0.000813446	2.14049e-08	8.41289	cctgatggggCagaggaaatc
chr1	35888430	+	C	20	9	0.45	0	0	1	1	T	11	M	0.258	0.658	0.000614251	0.00135738	0	7.4631	cttgtagctgCgggcgcttac
chr1	205716456	-	C	48	10	0.294	14	0.292	0.9976	1	T	24	M	0.168	0.462	0.000901992	0.00187599	6.99699e-09	5.12575	gaggtgtgaaCtttgtaatga
chr1	151242502	+	C	37	10	0.27	0	0	0.9961	1	T	27	M	0.154	0.43	0.000969729	0.00199177	4.82899e-08	4.63974	tcagtgagggCtcgcctattc
chr1	45618149	+	C	39	10	0.256	0	0	0.9962	1	T	29	M	0.146	0.411	0.00101047	0.00206687	4.16175e-08	4.364	taagagggggCacagccctcc
chr1	156743191	-	C	60	10	0.208	12	0.2	0.9951	0.9677	T	38	M	0.117	0.343	0.00115971	0.00228258	6.79723e-10	3.44356	tgagttgaggCcactgtgttc
chr1	2229457	+	C	34	9	0.265	0	0	0.9971	1	T	25	M	0.146	0.431	0.0021287	0.00388822	8.49734e-09	3.5111	gtgtaaggggCtgctggtgcc
chr1	19113804	-	C	39	8	0.205	0	0	0.9982	1	T	31	M	0.108	0.355	0.00262396	0.00462228	7.56277e-10	2.22581	cagcagggggCatcagctcca
chr1	10379873	+	C	25	8	0.32	0	0	0.9972	1	T	17	M	0.172	0.516	0.00402912	0.00673789	1.28158e-06	3.29619	atgcgctagtCaggagcacag
chr1	20485523	-	C	27	8	0.296	0	0	0.9959	1	T	19	M	0.159	0.485	0.00426746	0.00706487	3.91353e-06	3.00549	gcggcgtcccCcggcctctcg
chr1	182383506	-	C	28	8	0.286	0	0	0.9979	0.9333	T	20	M	0.153	0.471	0.00437609	0.00722055	5.08211e-07	2.87859	agaaggtgggCactggattag
chr1	154965581	-	C	34	8	0.235	0	0	0.9981	1	T	26	M	0.124	0.4	0.00491239	0.00792062	8.79148e-10	2.29704	gcagagtgggCagcctaagca

## Sheet: MLV_SRR10368079_R1
#SeqID	refPos	refStrand	refBase	cov	C_count	methRate	mut_count	mutRate	CR	SNR	CalledBase	CB_count	state	95_CI_lower	95_CI_upper	p-value_mState	p-value_mRate	p-value_mState_adj	score	seqContext
chrX	36893556	+	C	99	22	0.222	0	0	0.9703	0.9612	T	77	M	0.152	0.314	1.19502e-05	0.000316431	2.48731e-10	16.4158	ggctttcttcCaggctggaga
chrX	133488688	+	C	64	16	0.25	0	0	0.9726	1	T	48	M	0.16	0.368	0.000106169	0.00228713	1.07849e-07	10.1829	gtttacagggCcaagtgatcc
chrX	100485323	+	C	59	15	0.254	0	0	0.9746	1	T	44	M	0.161	0.378	0.000211578	0.00384165	1.1009e-06	8.84965	tgtggatgacCgaggaaggcc
chrX	135635021	-	C	40	11	0.275	0	0	0.9808	1	T	29	M	0.161	0.428	0.000441281	0.0069243	3.98661e-05	5.94511	aaccccccttCcggttctgtg
chrM	911	+	C	697	525	0.753	0	0	0.9702	0.9548	C	525	M	0.72	0.784	3.86084e-198	2.45356e-195	0	74610.9	acacaccgccCgtcaccctcc
chrM	909	+	C	719	369	0.513	0	0	0.9702	0.9599	C	369	M	0.477	0.55	4.0478e-109	1.28619e-106	0	19066.7	gcacacaccgCccgtcaccct
chr9	123291082	+	C	1544	1517	0.983	0	0	0.9383	0.9772	C	1517	M	0.975	0.988	0	0	1.05203e-09	29571.7	tttgatccttCgatgtcggct
chr9	105696662	-	C	28	20	0.833	4	0.143	0.9758	0.9655	C	20	M	0.641	0.933	1.26986e-09	5.76427e-08	0.0118132	114.133	cccaggcggaCcgatatggca
chr9	119958599	+	C	31	11	0.355	0	0	0.9817	1	T	20	M	0.211	0.531	0.000333178	0.00557196	3.33506e-05	8.07716	actgaggaggCaaaccatgca
chr8	46662171	-	C	74	33	0.446	0	0	0.9689	1	T	41	M	0.338	0.559	2.96018e-10	1.39348e-08	6.11683e-06	106.332	actgtctcacCaagatcttca
chr8	71821817	+	C	42	25	0.595	0	0	0.9707	0.9545	C	25	M	0.445	0.73	3.15454e-09	1.29663e-07	0.000704295	94.5617	cagtcagcatCcgagctagac
chr8	27765270	+	C	33	19	0.576	0	0	0.9774	0.9706	C	19	M	0.408	0.728	9.46457e-08	3.64529e-06	0.000764559	54.4586	gctcctcactCagggtgccag
chr8	72044997	+	C	64	16	0.25	0	0	0.9758	0.9275	T	48	M	0.16	0.368	0.000106169	0.00228713	4.53133e-08	10.1829	cttggtctgtCaggcggcagc
chr8	80400548	+	C	21	9	0.429	0	0	0.9791	1	T	12	M	0.245	0.635	0.000659196	0.00937915	0.000694571	7.0054	ttagaggacgCccatacaggg
chr7	44462378	-	C	48	22	0.458	0	0	0.9731	0.96	T	26	M	0.326	0.597	1.60397e-07	5.92237e-06	0.000254369	48.695	ggcccggaacCgggagctgag
chr7	16205818	+	C	409	17	0.708	385	0.941	0.9747	0.9951	G	385	M	0.508	0.851	1.63086e-07	5.92237e-06	0.00847685	58.6544	gttagtacttCgatgggagac
chr7	25486843	-	C	80	18	0.225	0	0	0.9779	0.9639	T	62	M	0.147	0.328	2.89695e-05	0.000694721	5.01831e-11	12.0347	gctccaggttCagggggaacc
chr7	44502367	+	C	37	13	0.351	0	0	0.9758	1	T	24	M	0.218	0.512	6.80793e-05	0.00157325	0.000204359	11.823	agcggctgggCggtagcgata
chr7	141201168	+	C	25	12	0.48	0	0	0.9758	1	T	13	M	0.3	0.665	8.56724e-05	0.00191034	0.00263268	14.6569	tgaatgggggCcctgaacccg
chr7	45718189	+	C	24	11	0.458	0	0	0.9779	1	T	13	M	0.279	0.649	0.000110472	0.00234017	0.00155177	12.1394	tgggagacttCaaggcttatg
chr7	44502362	+	C	37	12	0.324	0	0	0.9758	0.9737	T	25	M	0.196	0.485	0.000168837	0.00330141	0.000144248	8.88797	tggggagcggCtgggcggtag
chr7	105393142	-	C	39	12	0.308	0	0	0.9758	0.9286	T	27	M	0.186	0.464	0.000180093	0.00346815	0.000144248	8.34234	caatgtctaaCggggtttacg
chr7	26874195	-	C	25	11	0.44	0	0	0.9704	1	T	14	M	0.267	0.629	0.000238659	0.00421299	0.00358351	10.6247	aggtcggtgaCgcggagttat
chr7	78557089	+	C	49	14	0.286	0	0	0.9775	0.9074	T	35	M	0.178	0.424	0.000379428	0.0060987	9.67408e-06	8.54849	cccagagcacCggggccgaga
chr7	99508014	-	C	23	10	0.435	0	0	0.9685	0.9583	T	13	M	0.256	0.632	0.000561319	0.00820042	0.00317048	8.3332	ggcggcggccCcagctgcggg
chr6	125163409	-	C	225	197	0.876	0	0	0.9502	1	C	197	M	0.826	0.912	4.01215e-80	8.49907e-78	0.000144894	12919.9	gtcttatattCgaggtgccag
chr6	88480771	-	C	47	38	0.809	0	0	0.9721	0.9592	C	38	M	0.675	0.896	3.0657e-16	1.94825e-14	0.0039628	397.659	tggggagtgtCaggcctggag
chr6	124722608	-	C	30	17	0.567	0	0	0.9688	0.9677	C	17	M	0.392	0.726	6.1856e-07	2.01587e-05	0.00162084	41.3711	agctggagcgCagtgtggtga
chr6	124689717	+	C	31	16	0.516	0	0	0.9703	0.9688	C	16	M	0.348	0.68	2.199e-06	6.98733e-05	0.00106174	31.5388	tggcgtgcagCaggacacgat
chr6	4518517	+	C	76	18	0.237	0	0	0.9758	1	T	58	M	0.155	0.344	2.73294e-05	0.000681091	4.08431e-09	12.764	ccaggtcaagCagtgagtatt
chr6	33418956	+	C	20	12	0.6	0	0	0.9758	1	C	12	M	0.387	0.781	4.50951e-05	0.00106141	0.00263268	20.1602	gctctacagtCggagtggaga
chr6	3571026	+	C	28	10	0.357	0	0	0.9771	1	T	18	M	0.207	0.542	0.000737107	0.00986172	0.00128469	6.48597	ccctgaagagCaggaagaagt
chr5	115699040	+	C	681	147	0.216	0	0	0.9756	0.9942	T	534	M	0.187	0.248	8.55731e-31	9.06362e-29	0	824.753	cactgagattCgggatatgct
chr5	142946975	+	C	122	65	0.533	0	0	0.974	1	C	65	M	0.445	0.619	6.21997e-21	5.27039e-19	1.13256e-08	583.95	cgccctggaaCagagctgcgc
chr5	121974757	-	C	29	12	0.414	0	0	0.9758	1	T	17	M	0.255	0.593	0.000116385	0.00242501	0.00263268	12.0445	ctggggacggCccgaggccgc
chr5	142956027	+	C	53	15	0.283	0	0	0.974	1	T	38	M	0.18	0.416	0.000187721	0.00350872	1.2542e-06	10.0426	agctggccgcCtcggtggaga
chr5	5723460	-	C	72	15	0.208	0	0	0.9765	0.9863	T	57	M	0.131	0.316	0.000253836	0.0043598	5.20196e-10	7.03913	tagacgaaggCatgggaggag
chr5	142946482	+	C	72	15	0.208	0	0	0.974	0.973	T	57	M	0.131	0.316	0.000253836	0.0043598	1.13063e-09	7.03913	gctttctcgtCgtggcgcacg
chr5	29774521	+	C	27	10	0.37	0	0	0.9779	1	T	17	M	0.215	0.558	0.000705059	0.00958282	0.00114955	6.78649	agatgttcagCttcgaaggcg
chr4	43492804	-	C	459	157	0.342	0	0	0.9786	0.9957	T	302	M	0.3	0.387	2.27836e-42	3.21755e-40	0	1962.14	ccacacggggCtcattctcag
chr4	123177284	+	C	28	28	1	0	0	0.9758	0.9655	C	28	M	0.879	1	2.61483e-16	1.74918e-14	0.0294418	383.672	cagccttctcCggcgtcgctg
chr4	140449653	+	C	24	13	0.542	0	0	0.9758	1	C	13	M	0.351	0.721	2.58764e-05	0.000657778	0.00336117	20.9157	ttcagtggtgCttgggggagg
chr4	123177283	+	C	29	10	0.345	0	0	0.9758	0.9667	T	19	M	0.199	0.527	0.000383867	0.0060987	0.00148897	6.81132	ccagccttctCcggcgtcgct
chr3	5925524	+	C	218	212	0.972	0	0	0.9758	0.9646	C	212	M	0.941	0.987	1.61654e-109	6.84876e-107	1.39788e-08	21709.1	ttaaggtagcCaaatgcctcg
chr3	5925523	+	C	266	78	0.293	0	0	0.9758	0.9638	T	188	M	0.242	0.351	7.74297e-20	6.15082e-18	0	360.411	cttaaggtagCcaaatgcctc
chr3	4404175	+	C	29	22	0.759	0	0	0.9744	1	C	22	M	0.579	0.878	2.77633e-10	1.3572e-08	0.0178714	121.714	gtgctgtaggCtagctgcact
chr3	88388976	-	C	35	10	0.286	0	0	0.9781	1	T	25	M	0.163	0.451	0.000462761	0.0071728	4.30733e-05	5.44426	gagaggcaggCatggagttct
chr2	103599846	-	C	146	43	0.295	0	0	0.9726	1	T	103	M	0.227	0.373	1.32596e-10	7.02206e-09	2.75335e-13	96.2495	tggggtatctCgaggagggtc
chr2	131020750	-	C	33	15	0.455	0	0	0.9734	1	T	18	M	0.298	0.62	7.7294e-06	0.000213567	0.000538471	22.8827	tggcagcactCgagggccagg
chr2	174187182	+	C	72	18	0.25	0	0	0.9758	0.973	T	54	M	0.164	0.361	2.55898e-05	0.000657778	4.08431e-09	13.5876	ccagcatgttCgatgtgggcg
chr2	157304663	+	C	23	12	0.522	0	0	0.9789	1	C	12	M	0.33	0.708	6.94966e-05	0.00157733	0.00180063	16.4471	actcgctgagCacgggacaga
chr2	71646997	+	C	26	10	0.385	0	0	0.9758	1	T	16	M	0.224	0.575	0.00067152	0.00937915	0.00148897	7.11639	gcacctcgggCagaagcactc
chr19	5415033	-	C	68	19	0.279	0	0	0.9758	1	T	49	M	0.187	0.396	1.06543e-05	0.000288119	1.87237e-07	17.6462	gtagtgttctCtggggatccc
chr18	54832136	-	C	84	84	1	0	0	0.9758	0.9767	C	84	M	0.956	1	3.17862e-46	5.05004e-44	0.000201293	3654.67	taagtgggagCcccccccccc
chr18	7869434	+	C	27	27	1	0	0	0.9571	0.9643	C	27	M	0.875	1	2.87631e-14	1.74085e-12	0.107384	320.071	gcgccagtaaCggggaggtgc
chr17	27341764	-	C	179	71	0.397	0	0	0.9687	0.9728	T	108	M	0.328	0.47	2.43533e-19	1.82077e-17	5.30009e-12	433.307	gaagaaactgCaggagaagtt
chr17	40155714	+	C	198	40	0.202	0	0	0.9758	0.9429	T	158	M	0.152	0.263	1.51914e-09	6.65804e-08	0	53.6195	ccgggaggggCccgtttcggc
chr17	40157160	+	C	130	30	0.231	0	0	0.9758	0.963	T	100	M	0.167	0.31	2.95494e-07	1.04326e-05	2.33147e-15	32.6537	tcccgcgaggCtctccgccgc
chr17	34147819	+	C	22	10	0.455	0	0	0.9758	1	T	12	M	0.269	0.653	0.000521225	0.00787626	0.00148897	8.83777	ccagtgtatgCgccagagagg
chr17	35485850	+	C	42	10	0.238	0	0	0.977	1	T	32	M	0.135	0.385	0.000532933	0.00787626	1.45821e-06	4.41271	agcgtgaagaCagctgcctgg
chr17	27971681	-	C	20	9	0.45	0	0	0.971	1	T	11	M	0.258	0.658	0.000614251	0.00887173	0.0264938	7.4631	ggtgtggttaCagggtcccct
chr16	91331538	+	C	37	18	0.486	0	0	0.9758	0.9487	T	19	M	0.334	0.641	4.86397e-07	1.62687e-05	0.000794016	38.0063	ctgggccgggCcctcagtctc
chr16	18442959	-	C	30	12	0.4	0	0	0.9672	1	T	18	M	0.246	0.577	0.000123618	0.00253418	0.00620992	11.5317	gctgcagataCgtgaggagat
chr15	86079144	+	C	1642	347	0.211	1	0.001	0.9758	0.9791	T	1294	M	0.192	0.232	5.64962e-70	1.02581e-67	0	4622.82	ctgggcagggCaaagccagag
chr15	102057688	+	C	112	39	0.348	0	0	0.972	0.9739	T	73	M	0.266	0.44	1.72407e-10	8.76518e-09	4.4332e-10	101.418	ttgccagtgtCtccagatggt
chr15	51653502	-	C	103	23	0.223	0	0	0.9765	1	T	80	M	0.154	0.313	3.21331e-06	9.45745e-05	1.23701e-12	19.413	cagcaatcatCtggggaagag
chr14	47617559	+	C	111	27	0.243	0	0	0.9772	1	T	84	M	0.173	0.331	3.40518e-07	1.16972e-05	2.47469e-13	30.1927	caaggatatcCgggtgcatgg
chr14	24545904	+	C	46	17	0.37	0	0	0.9734	1	T	29	M	0.245	0.514	2.83679e-05	0.000693377	6.30071e-05	18.9572	tctgagaggaCaaataaacta
chr14	55909332	-	C	21	11	0.524	0	0	0.975	1	C	11	M	0.324	0.717	0.000164799	0.0032728	0.00222557	13.47	gcggcagcggCagcagcgacc
chr13	45023374	-	C	226	109	0.482	0	0	0.9758	0.9912	T	117	M	0.418	0.547	1.5229e-33	1.9356e-31	1.9984e-15	1495.21	ggtataggggCaaaagactaa
chr13	54344195	-	C	806	164	0.203	0	0	0.9758	0.9538	T	642	M	0.177	0.233	3.6668e-33	4.23682e-31	0	942.168	aagagaggggCccgtgccttg
chr13	97327051	-	C	148	64	0.646	49	0.331	0.9758	0.9933	C	64	M	0.548	0.734	2.14483e-23	1.9472e-21	3.10894e-06	795.663	tgagagatagCcagttgtagt
chr13	97327050	-	C	71	24	0.338	0	0	0.9758	1	T	47	M	0.239	0.454	9.05256e-08	3.59556e-06	6.02929e-08	40.3743	gagagatagcCagttgtagtg
chr13	86194776	-	C	87	18	0.207	0	0	0.9758	1	T	69	M	0.135	0.304	0.000183177	0.00347489	1.11742e-10	9.0861	ccagagtatcCggaggttcac
chr13	6605666	+	C	30	11	0.367	0	0	0.979	1	T	19	M	0.219	0.545	0.000318805	0.00540269	5.67232e-05	8.41289	tcgtcttcaaCgagatgaaag
chr13	97063255	-	C	47	14	0.298	0	0	0.9758	1	T	33	M	0.187	0.44	0.000361685	0.00589361	1.37183e-05	8.98672	agggtgagtgCttagtgtctg
chr13	21964720	-	C	42	10	0.238	0	0	0.9777	1	T	32	M	0.135	0.385	0.000532933	0.00787626	1.25258e-06	4.41271	ctcgccatgtCtgagactgct
chr12	78397929	+	C	197	193	0.98	0	0	0.9758	0.9752	C	193	M	0.949	0.992	2.28733e-102	5.8144e-100	6.35771e-08	18615.5	tttgatccttCgatgtcggct
chr11	58193372	-	C	40	40	1	0	0	0.9758	0.9524	C	40	M	0.912	1	1.86034e-23	1.81884e-21	0.00267619	829.547	gcgccagactCaaggtgacaa
chr11	97672648	-	C	305	79	0.259	0	0	0.9758	0.9967	T	226	M	0.213	0.311	1.13263e-18	7.99761e-17	0	302.063	ctgtgatcaaCtgtgcagaca
chr11	68795280	+	C	76	21	0.276	0	0	0.9743	1	T	55	M	0.188	0.386	2.52957e-06	7.84166e-05	2.89844e-08	22.1439	aggagaagggCaaatacaagg
chr11	48691372	+	C	100	24	0.24	0	0	0.9758	1	T	76	M	0.167	0.332	2.75898e-06	8.34921e-05	3.04978e-12	22.2697	accgcagttcCcggacatgat
chr11	84782936	+	C	21	11	0.524	0	0	0.9758	1	C	11	M	0.324	0.717	0.000164799	0.0032728	0.00201057	13.47	aagttctatgCggtggtggct
chr11	50274723	+	C	23	11	0.478	0	0	0.9699	1	T	12	M	0.292	0.67	0.000202698	0.00373376	0.00375754	11.8774	ttatggtagcCaaatgatggg
chr11	87941925	+	C	64	15	0.234	0	0	0.9779	0.9846	T	49	M	0.147	0.351	0.000229214	0.00410325	1.4013e-08	8.05284	atcagattacCaggaacatag
chr11	69812065	-	C	70	14	0.2	0	0	0.9757	0.9333	T	56	M	0.123	0.308	0.00052118	0.00787626	3.1624e-10	5.65547	gcggcggcggCagcacagtag
chr11	32157602	+	C	26	10	0.385	0	0	0.9702	1	T	16	M	0.224	0.575	0.00067152	0.00937915	0.00270365	7.11639	ctgaagaaggCtatccagaga
chr10	81401438	+	C	42	13	0.31	0	0	0.9704	0.913	T	29	M	0.191	0.46	0.000708722	0.00958282	2.38033e-05	7.80837	actctctgctCtgggttctca
chr1	46115252	-	C	24	24	1	0	0	0.9758	0.9231	C	24	M	0.862	1	6.20201e-14	3.58307e-12	0.0195284	273.242	ttaaggtagcCaaatgcctcg
chr1	113831717	-	C	70	35	0.5	0	0	0.9707	0.9459	CT	35	M	0.386	0.614	5.64289e-11	3.11831e-09	6.24628e-06	138.441	aagtgggaggCcatggcaccc
chr1	131501613	+	C	40	16	0.457	5	0.125	0.9758	1	T	19	M	0.305	0.618	3.27402e-06	9.45745e-05	0.00049085	26.7364	ctggtagcgcCgggatcaggt
chr1	71632246	-	C	40	16	0.4	0	0	0.9769	1	T	24	M	0.263	0.554	4.66293e-06	0.000131702	0.000415645	22.4753	gtggtcatttCagatgcgatt
chr1	135694141	+	C	83	17	0.205	0	0	0.975	0.9765	T	66	M	0.132	0.304	0.000353793	0.00583987	7.63589e-11	7.74447	gccgggacagCcgggatcgcc
chr1	135694423	+	C	27	10	0.37	0	0	0.975	1	T	17	M	0.215	0.558	0.000705059	0.00958282	0.00163656	6.78649	aaggcgggggCgagatcgact

## Sheet: MLV_SRR10368080_R2
#SeqID	refPos	refStrand	refBase	cov	C_count	methRate	mut_count	mutRate	CR	SNR	CalledBase	CB_count	state	95_CI_lower	95_CI_upper	p-value_mState	p-value_mRate	p-value_mState_adj	score	seqContext
chrX	86282023	+	C	149	59	0.396	0	0	0.9761	0.9255	T	90	M	0.321	0.476	2.38868e-17	7.52436e-16	7.14673e-12	314.81	gggtgtgtggCggggccaggg
chrM	911	+	C	706	555	0.786	0	0	0.9682	0.9339	C	555	M	0.754	0.815	2.51981e-214	5.55618e-212	0	89428	acacaccgccCgtcaccctcc
chrM	909	+	C	725	398	0.549	0	0	0.9682	0.9355	C	398	M	0.513	0.585	9.87575e-120	1.45173e-117	0	24278	gcacacaccgCccgtcaccct
chr9	123291082	+	C	1953	1920	0.983	0	0	0.9422	0.9746	C	1920	M	0.976	0.988	0	0	2.66453e-14	37492.4	tttgatccttCgatgtcggct
chr9	105696662	-	C	29	20	0.87	6	0.207	0.9838	1	C	20	M	0.679	0.955	6.31571e-10	1.3263e-08	0.00393561	124.879	cccaggcggaCcgatatggca
chr9	108442347	+	C	27	13	0.481	0	0	0.9742	1	T	14	M	0.307	0.66	1.81003e-05	0.000199556	0.00403227	18.9531	aggggcagtgCaggacaaggg
chr9	44246496	+	C	31	12	0.387	0	0	0.9751	0.9688	T	19	M	0.237	0.562	0.000130658	0.00125261	0.000163043	11.061	actgagggggCccgcgccgag
chr8	46662171	-	C	58	27	0.466	0	0	0.9713	0.9831	T	31	M	0.343	0.592	5.17229e-09	8.14636e-08	9.78568e-05	76.8108	actgtctcacCaagatcttca
chr8	72044997	+	C	76	19	0.25	0	0	0.9786	0.987	T	57	M	0.166	0.358	1.25132e-05	0.000145219	2.74015e-09	15.4897	cttggtctgtCaggcggcagc
chr8	71821817	+	C	26	11	0.423	0	0	0.967	1	T	15	M	0.255	0.611	0.000255817	0.00238313	0.00486184	10.0932	cagtcagcatCcgagctagac
chr8	27765270	+	C	25	10	0.4	0	0	0.9742	1	T	15	M	0.234	0.593	0.000636424	0.00510296	0.00180399	7.48021	gctcctcactCagggtgccag
chr7	126158133	-	C	74	15	0.203	0	0	0.9763	0.9737	T	59	M	0.127	0.308	0.000259388	0.00238313	5.50587e-10	6.82441	aacgggaagaCaaagccaaga
chr7	98918082	+	C	58	13	0.224	0	0	0.9764	1	T	45	M	0.136	0.347	0.000954329	0.00725619	2.57566e-07	5.33735	cgcaggaaggCagggccagca
chr6	125163409	-	C	125	110	0.88	0	0	0.9528	1	C	110	M	0.811	0.926	5.23341e-47	3.29705e-45	0.00211268	4130.91	gtcttatattCgaggtgccag
chr6	88480771	-	C	43	32	0.744	0	0	0.9733	0.9773	C	32	M	0.598	0.851	7.638e-13	1.98139e-11	0.00150268	231.721	tggggagtgtCaggcctggag
chr6	4518517	+	C	75	19	0.253	0	0	0.9761	0.9868	T	56	M	0.169	0.362	1.22909e-05	0.000145219	6.43218e-09	15.73	ccaggtcaagCagtgagtatt
chr6	125079552	+	C	32	11	0.344	0	0	0.9761	1	T	21	M	0.204	0.517	0.000347028	0.00306079	9.46564e-05	7.76731	ccccggagggCaagtggagct
chr6	113317302	-	C	20	10	0.5	0	0	0.9726	1	CT	10	M	0.299	0.701	0.00043592	0.00369694	0.00213968	10.0581	caagaaagccCtggagggcaa
chr6	83034527	+	C	50	13	0.26	0	0	0.9764	1	T	37	M	0.159	0.396	0.000845538	0.00665861	2.57958e-07	6.34018	cccaaaggaaCaggatggtac
chr5	115699040	+	C	618	126	0.204	0	0	0.9781	0.9936	T	492	M	0.174	0.237	6.38165e-27	2.81431e-25	0	574.28	cactgagattCgggatatgct
chr5	142946975	+	C	71	29	0.408	0	0	0.9743	0.9861	T	42	M	0.302	0.525	1.92627e-09	3.53951e-08	4.97154e-07	76.249	cgccctggaaCagagctgcgc
chr4	43492804	-	C	320	121	0.378	0	0	0.9777	0.9816	T	199	M	0.327	0.432	1.82765e-33	1.00749e-31	0	1294.3	ccacacggggCtcattctcag
chr4	152387987	+	C	20	13	0.65	0	0	0.9743	1	C	13	M	0.433	0.819	1.28843e-05	0.000145692	0.00399624	27.516	ccaggatgctCgggagaggtg
chr3	5925524	+	C	102	102	1	0	0	0.9761	0.9623	C	102	M	0.964	1	7.46722e-57	6.58608e-55	3.55265e-05	5517.15	ttaaggtagcCaaatgcctcg
chr3	5925523	+	C	140	61	0.436	0	0	0.9761	0.9722	T	79	M	0.356	0.518	2.0685e-18	7.017e-17	1.5824e-10	384.443	cttaaggtagCcaaatgcctc
chr3	130522781	-	C	60	14	0.233	0	0	0.9767	0.9677	T	46	M	0.144	0.354	0.000462506	0.0038484	1.1149e-08	6.74153	cccctggcaaCaggattgttt
chr2	103599846	-	C	99	32	0.323	0	0	0.9718	1	T	67	M	0.239	0.42	4.81618e-09	7.86642e-08	1.15335e-08	63.6636	tggggtatctCgaggagggtc
chr2	34666360	+	C	82	17	0.207	0	0	0.9758	1	T	65	M	0.134	0.307	6.34947e-05	0.000651189	5.75604e-11	9.5373	aaaggtgggtCagggtgtgtg
chr2	131020750	-	C	33	15	0.455	0	0	0.9686	1	T	18	M	0.298	0.62	8.275e-05	0.000829381	0.00100567	18.2737	tggcagcactCgagggccagg
chr2	174188062	+	C	53	13	0.245	0	0	0.9761	1	T	40	M	0.149	0.376	0.000889181	0.00687945	2.79244e-07	5.9228	tggagatgggCgccactactg
chr19	44293589	+	C	92	24	0.261	0	0	0.9761	1	T	68	M	0.182	0.359	2.40935e-06	3.12507e-05	8.90443e-11	24.5427	caaagcttcgCgggctaatca
chr19	5415033	-	C	61	13	0.213	0	0	0.9766	1	T	48	M	0.129	0.331	0.000989445	0.00739568	5.85998e-09	5.03859	gtagtgttctCtggggatccc
chr19	8989234	+	C	39	9	0.231	0	0	0.9753	1	T	30	M	0.126	0.383	0.00116204	0.00840098	4.22397e-05	3.3401	attgaagggcCagatgcaaaa
chr18	54832136	-	C	48	46	0.958	0	0	0.9761	1	C	46	M	0.86	0.988	1.71936e-23	6.89307e-22	0.00476393	900.821	taagtgggagCcccccccccc
chr18	54832241	-	C	122	29	0.238	0	0	0.9761	0.976	T	93	M	0.171	0.321	8.84136e-08	1.25775e-06	4.01901e-14	34.9593	gaaaccactgCcaagggaacg
chr17	27341764	-	C	150	58	0.387	0	0	0.9661	0.9934	T	92	M	0.312	0.467	4.71152e-15	1.29861e-13	6.27323e-11	259.666	gaagaaactgCaggagaagtt
chr17	40155714	+	C	132	38	0.288	0	0	0.9761	0.9429	T	94	M	0.218	0.37	7.16257e-10	1.43577e-08	1.14131e-13	75.5829	ccgggaggggCccgtttcggc
chr17	40155343	+	C	195	40	0.205	0	0	0.9761	0.9286	T	155	M	0.154	0.267	2.73358e-09	4.63657e-08	0	52.8904	agtcctccttCccctcttcgg
chr17	40157160	+	C	80	26	0.325	0	0	0.9761	0.9877	T	54	M	0.232	0.434	4.33063e-08	6.58554e-07	5.57055e-09	44.5006	tcccgcgaggCtctccgccgc
chr17	24888894	+	C	34	11	0.324	0	0	0.9725	1	T	23	M	0.191	0.492	0.000373238	0.00322741	0.000161793	7.21412	taccaagatgCgggtgctgtg
chr15	86079144	+	C	1197	339	0.284	2	0.002	0.9761	0.9868	T	856	M	0.259	0.31	1.14834e-79	1.26605e-77	0	6926.94	ctgggcagggCaaagccagag
chr15	102057688	+	C	94	39	0.415	0	0	0.9717	0.9792	T	55	M	0.321	0.516	8.10326e-12	1.88081e-10	9.97482e-08	138.657	ttgccagtgtCtccagatggt
chr15	5148090	+	C	21	12	0.571	0	0	0.9761	1	C	12	M	0.365	0.755	5.31609e-05	0.00055819	0.00256548	18.7456	cccaagagggCagctgtcgca
chr15	99306796	+	C	50	11	0.22	0	0	0.9806	1	T	39	M	0.128	0.352	0.000527484	0.00430779	2.29388e-08	4.59847	gccaggcctgCagagagtgga
chr14	24545904	+	C	28	16	0.571	0	0	0.971	1	C	16	M	0.391	0.735	1.46086e-06	1.95225e-05	0.0102607	36.4786	tctgagaggaCaaataaacta
chr13	45023374	-	C	149	84	0.564	0	0	0.9761	0.9933	C	84	M	0.484	0.641	2.1096e-28	1.0337e-26	1.50899e-09	1124.07	ggtataggggCaaaagactaa
chr13	97327051	-	C	153	53	0.541	55	0.359	0.9843	0.9935	G	55	M	0.442	0.636	2.25032e-19	8.26991e-18	9.61662e-09	437.315	tgagagatagCcagttgtagt
chr13	97327050	-	C	82	31	0.378	0	0	0.9843	1	T	51	M	0.281	0.486	5.57757e-10	1.22985e-08	8.57961e-10	80.5452	gagagatagcCagttgtagtg
chr13	86194776	-	C	65	25	0.385	0	0	0.9761	0.942	T	40	M	0.276	0.506	5.57011e-08	8.18806e-07	1.48036e-06	50.0442	ccagagtatcCggaggttcac
chr13	23929074	-	C	22	9	0.409	0	0	0.9829	0.9565	T	13	M	0.233	0.613	0.0014033	0.00998151	0.000386781	5.97102	ggagagagggCataatggttt
chr12	78397929	+	C	91	90	0.989	0	0	0.9761	1	C	90	M	0.94	0.998	2.08167e-48	1.53002e-46	6.1641e-05	4035.36	tttgatccttCgatgtcggct
chr11	97672648	-	C	267	70	0.262	0	0	0.9761	0.9963	T	197	M	0.213	0.318	7.5823e-17	2.2292e-15	0	240.416	ctgtgatcaaCtgtgcagaca
chr11	58193372	-	C	26	24	0.923	0	0	0.9761	0.963	C	24	M	0.759	0.979	1.52444e-12	3.73489e-11	0.0190668	215.137	gcgccagactCaaggtgacaa
chr11	50093704	-	C	120	28	0.233	0	0	0.9763	0.9917	T	92	M	0.167	0.317	1.83318e-07	2.52635e-06	1.95399e-14	31.4361	ctggggagggCcctgctcagt
chr11	48691372	+	C	70	20	0.286	0	0	0.9761	0.9859	T	50	M	0.193	0.401	4.958e-06	6.07355e-05	1.04929e-08	20.4995	accgcagttcCcggacatgat
chr11	68795280	+	C	25	12	0.48	0	0	0.9763	1	T	13	M	0.3	0.665	8.56724e-05	0.00083959	0.00250096	14.6569	aggagaagggCaaatacaagg
chr11	74574499	-	C	28	11	0.393	0	0	0.9748	1	T	17	M	0.236	0.576	0.000288433	0.0025959	0.00226194	9.17627	tgtgtgaagaCattcacagga
chr10	81401438	+	C	30	13	0.433	0	0	0.9726	0.9091	T	17	M	0.274	0.608	4.63569e-05	0.000498619	0.00477064	15.4245	actctctgctCtgggttctca
chr1	113831717	-	C	50	27	0.54	0	0	0.9711	0.9615	C	27	M	0.404	0.67	2.19689e-09	3.87531e-08	0.000952686	94.4404	aagtgggaggCcatggcaccc
chr1	71632246	-	C	25	15	0.6	0	0	0.9709	1	C	15	M	0.407	0.766	2.90449e-06	3.65966e-05	0.00860231	33.8355	gtggtcatttCagatgcgatt
chr1	178163719	-	C	39	9	0.231	0	0	0.9761	0.975	T	30	M	0.126	0.383	0.00116204	0.00840098	3.75599e-05	3.3401	ttataggagaCggcaaaacag
